# Supplementary material for: A cloud identification algorithm over the Arctic for use with AATSR/SLSTR measurements
Source: Copernicus journal article supplement (doi:10.5194/amt-2018-231), 2018-07-26
Supplement: Supplementary file [file amt-2018-231-AC3-supplement.pdf]

## Reply to Anonymous Referee #2

We would like to thank you for the review and your constructive comments which help to improve the manuscript. We have revised the manuscript accordingly and our point-by-point responses (in blue) to the specific comments (in red) are given. The modification made in the manuscript is presented in green. This document also includes a marked-up version of manuscript.

Best Regards,  
Soheila Jafariserajehlou

---

### Comments to the Author:

Reviewer #2: Please check you English. The content of the paper really suffer from lack of structure, wrong grammar and misplaced commas. Also, you should not use an article before ASCIA, except when it is used as adjective. Example: “ASCIA retrieves clouds over Artic” or “The ASCIA retrieval over Artic”. This is true for all acronyms and abbreviations (e.g. SLSTR). Since (which certainly does not require a comma) introduces a subordinate sentence, which cannot be separated from the main clause by a full stop.

- ✓ We have corrected all these points throughout the manuscript.

Reviewer #2: It is not clear to me whether or not your algorithm is applicable during winter. At line 357 you write that your targeted seasons are spring, summer and autumn and then you choose March, May and July. This is already confusing by itself. Later, at line 362 you write that ASCIA is not optimized for winter time. Could you please clarify this?

- ✓ We are sorry for this inaccurate statement. The algorithm is not optimized for night time retrievals (the information from the visible channels may not be valid during night) and we do not attempt to apply it during polar night. In fact, we only had access to 3 months (March, May and July) of SYNOP data which we used for validation. We understood the confusion arising from this statement and it would be better not to mention seasons here. We modified the text as below:
- ✓ Modification: Line 380 - 388: Three months of data from March, May and July have been acquired over Greenland and Svalbard to assess the performance of ASCIA in a wide range of solar zenith angles (60°-85°), surface and atmospheric conditions observed at high latitudes. In order to take various surface types in the Arctic into account, we selected case studies including, highly variable topography and fairly homogeneous snow cover, coast lines, land and ocean along snow and ice covered surface. The designed criteria for ASCIA are optimized for various regions over the Arctic observed under different solar illumination conditions. Polar night and transition seasons at low light conditions are excluded from our retrievals.

Reviewer #2: Fig. 5 The left panel over Greenland shows 2 rectangles in left part of the image. Could you please discuss where they arise from? Your algorithm shows promising results, but it is always worthwhile to discuss its limitations.

✓ We see these rectangles on the middle and right panels over Greenland:

**Middle panel:** In the middle panel, these 2 rectangles are indicators of the blocks with low Pearson Correlation Coefficient (PCC smaller than 0.4). As we can see from the corresponding RGB image, the locations of these two rectangles are over/near open water. We already discussed this shortcoming of the PCC analysis at lines 322-325 (in the original version of this manuscript): “Small PCC values may be caused by rapid surface change, high aerosol load or lack of recognizable spatial pattern, which is often the case over homogeneous snow covered surface”. Therefore the lack of geo-physical patterns and structure could be a potential reason in this case. We also mentioned at lines 318-319 in the original version of manuscript “The combination of these two constraints is necessary because neither PCC analysis nor the reflectance part of  $3.7 \mu\text{m}$  is adequate on its own for accurate cloud detection”.

**Right panel:** However, using the reflectance of  $3.7 \mu\text{m}$  compensates the limitation of the PCC criterion as we explained at line 393-396. As we can see in the final results of this image (in Fig. 12 in the results section) these two rectangles over open water disappeared. Therefore the right panel in Fig. 5 (in original version of the manuscript) should not have these rectangles as well.

We thank the referee for this information. We realized that we have used erroneously an outdated version of this picture (which was not created using the right running version of the algorithm).

We have updated the right panel in Fig. 5 (with an improved color scheme (comment from the reviewer #1)). Please see below.

✓ Modification: Line 705 Fig. 5.

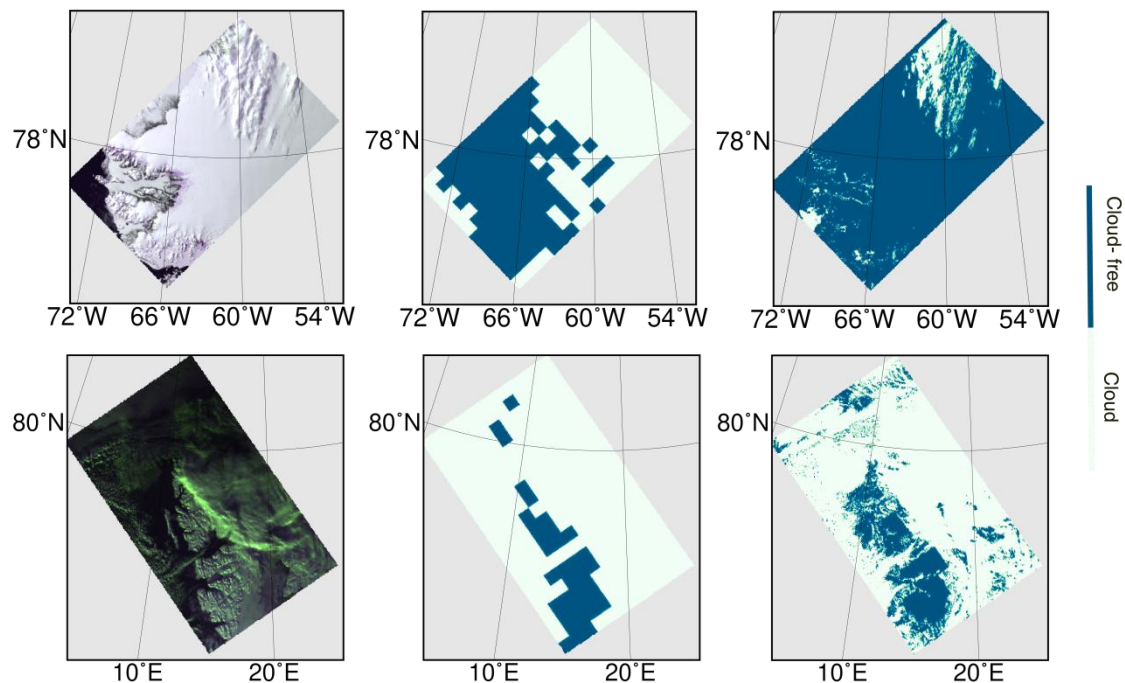

Reviewer #2: L398 You say the computing time is higher. How higher? Please give an estimate.

- ✓ The run-time of one scene is 30 minutes on a state-of-the-art computer system.

Reviewer #2: L428 I agree with the other reviewer, 45 minute time difference seem to me quite large for validation purposes. Maybe you should introduce a filtering?

- ✓ In preparation of the article, we performed a comprehensive review of previous works to define the optimal maximum time difference. However, statements in literature strongly vary: 10 min (Werkmeister et al., 2015), 15 min (Musial et al., 2014), 1 h (Dybbroe et al., 2005) and 4 h (Meerkötter et al., 2004), obviously all for different kinds of meteorological conditions. The investigation and results in the previous publications indicate that temporal difference in validation of satellite retrievals against SYNOP may vary based on meteorological conditions. Therefore we also tried to check meteorological conditions in our study.
- ✓ First, we checked to see which fraction of our results could be affected by longer temporal difference? We found that in 30% of our validation scenarios time difference exceeds half an hour. We tried to answer your question in these 30%. Do clouds change in the interval of 45 minutes? Or clouds could be almost stable due to the unique Arctic environment compared to lower latitudes? To answer this question we have performed 2 investigations:
  - 1) We checked SYNOP data before and after validation time to see whether cloud changes could be observed during this time? Available to us were SYNOP data, i.e. cloud fraction every 3 hours over Svalbard and every 1 hour over Greenland. We found that only in 12% of our validation scenarios cloud fraction changed ( $\pm 1$  or  $\pm 2$  oktas) within 2 hours (for Greenland) and – 6 hours (for Svalbard).
  - 2) Another perspective on this topic is to ask how fast cloud can travel during our validation time window? We have checked the wind speed over Svalbard to answer the question. How strong the wind needs to be to move clouds out of or into in our validation area which is defined as a circle with the radius of 20 km around each SYNOP station? If we assume that the cloud is in the middle of this circle, we need at least a wind speed of 7.5 m/s to move clouds out of or into this circle in 45 minutes. Based on information from the Norwegian Meteorological Institute which provides an average of hourly wind speed, we see that the average wind speed over or close to the selected SYNOP stations at the closest stations during satellite overpass time is usually very low. For example below 3m/s and only in one scenario, it exceeds 7.5m/s slightly.
- ✓ Second, choosing a smaller temporal difference like for instance 0.5h would limit the number of observations and introduce a sampling error. For example, by filtering the validation dataset with respect to 0.5h temporal difference, 30% of the validation data will be lost. Therefore, to have a trade-off between good statistics/sampling and representativeness, we decided to keep the temporal interval of 45 minutes.
- ✓ However, temporal difference between satellite and SYNOP measurements is one of several sources of uncertainty (different viewing perspective, different spatial footprint etc.) which affect validation results.

We have updated the text to address this comment and explain the uncertainty which originates from time difference.

- ✓ Modification: Line 453-465: To define the optimal maximum temporal difference between SYNOP and satellite data, other comparable validation activities used different temporal intervals like 10 min (Werkmeister et al., 2015), 15 min (Musial et al., 2014), 1 h (Dybbroe et al., 2005) and 4 h (Meerkötter et al., 2004). The investigation and results in the previous publications indicate that temporal difference in validation of satellite retrievals against SYNOP may vary based on meteorological conditions. Allowing only a small temporal difference between measurement datasets (here: SYNOP and ASCIA) ensures as close as possible temporal resemblance but can introduce a significant sampling error due to limited number of validation cases (Bojanowski et al., 2014). According to Bojanowski et al. (2014) a temporal difference of 90 min to compare with SYNOP measurements at temporal resolution of 3 h minimizes the sampling error (Bojanowski et al., 2014). However, potential longer temporal difference will introduce an error which should be considered along other sources of uncertainty (different viewing perspective, different spatial footprint and etc.). In this study, the maximum allowed temporal difference between the ASCIA retrievals and SYNOP measurements is small being below  $\pm 20$  minutes in most cases and generally does not exceed  $\pm 45$  minutes.
- ✓ Line 544: Bojanowski, J., Stöckli, R., Tetzlaff, A., and Kunz, H.: The Impact of Time Difference between Satellite Overpass and Ground Observation on Cloud Cover Performance Statistics, Remote Sensing, 6, 12 866–12 884, <https://doi.org/10.3390/rs61212866>, 2014.
- ✓ Line 561: Dybbroe, A., Karlsson, K.-G., Thoss, A., NWCSAF AVHRR cloud detection and analysis using dynamic thresholds and radiative transfer modeling. Part II: Tuning and validation. J. Appl. Meteorol., 44, 55–71, 2005.
- ✓ Line 626: Meerkötter, R., König, C., Bissolli, P., Gesell, G., Mannstein, H., A 14-year European cloud climatology from NOAA/AVHRR data in comparison to surface observations. Geophys. Res. Lett., 31, doi:10.1029/2004GL020098, 2004.

Reviewer #2: Sections Results and Validation could be compressed in one section, as even when presenting the results you do some qualitative validation against other cloud products.

- ✓ Done.

Reviewer #2: L454 Could you please show part of the evaluation against AERONET? AS the latter is a well-known reference for every reader, the validation against it deserves more than 2 lines of text. Also, which version are you using? And why L1.5 instead of L2.0?

- ✓ We agree and modified the text as below. Unfortunately it was not possible to perform further statistical analysis (like we did for SYNOP) in validation against AERONET because the comparison is pixel-based and does not include a circular area around the station where we could estimate cloud fraction.  
The reason for selecting level 1.5 instead of level 2.0 is that, level 1.5 data are cloud screened but level 2.0 data are quality assured. This means if we use level 1.5 data and check whether we have aerosol

measurements or not (having aerosol measurements means cloud-free condition) we could have information of cloudiness. But, in level 2.0 data, missing aerosol data could also be due to low quality of measurements.

- ✓ Modification: Line: 492-495: We also validated ASCIA cloud identification results with AERONET level 1.5 measurements. Because level 1.5 data are cloud screened. The procedure of this validation includes 2 steps: (1) covering AERONET observed AOT to a cloud flag (AOT is provided in AERONET only in cloud-free conditions); (2) Validation of ASCIA with AERONET cloud flag. In 86.1 % of 36 studied scenes over Svalbard, both ASCIA and AERONET confirm the presence of clouds.

Reviewer #2: Technical comments L151 The SLSTR revisit time is 1.9 day at the equator with one satellite and 0.9 day with two satellites, not single/dual view.

- ✓ Done.
- ✓ Modification: lines 161-162: This yields global revisit times of 1.9 days at the equator with two satellites and 0.9 day with one satellite.

Reviewer #2: Table 3. The title of the second column should be something like “Test”

- ✓ Done.
- ✓ Modification: line 698.

| Surface Type | Test                                                     | Description                     |
|--------------|----------------------------------------------------------|---------------------------------|
| Water        | $R_{0.87} < 11\% \ \& \ NDSI \geq 0.4$                   | MODIS snow and ice mapping ATBD |
| Sea-ice      | $R_{0.87} > 11\% \ \& \ NDSI \geq 0.4$                   | (Hall et al., 2001)             |
| Land         | $R_{3.7} > 0.04 \ \& \ R_{0.66} < 0.2 \    \ NDSI < 0.4$ | Allen et al., 1999              |
| Snow         | $R_{3.7} \leq 0.04$                                      | Allen et al., 1999              |

Reviewer #2: Figures 1-2, fig. from 5 to 13 and fig. 16 should indeed be larger.

- ✓ Done.

Reviewer #2: L339-347 please simplify these lines. Throughout your manuscript sentences are often too long, but here they really affect the readability. Simplify the lines here and maybe add more information on the caption of the figures (for example the exact coordinates of the corners)

- ✓ Done.
- ✓ Modification: line 357-362: A representative example of the block level (25×25 km<sup>2</sup>) and scene level (1×1 km<sup>2</sup>) results of ASCIA applied to AATSR observations is shown in Fig. 5. This example was selected to show the performance of the algorithm in presence of different surface conditions: 1) one scene is over a combination of fairly homogeneous snow cover, land, ocean, sea-ice and cloud scene at north-west of

Greenland taken on the 18 May 2008; 2) another example is over a surface with highly variable topography over Svalbard with relatively higher solar zenith angle ( $>80^\circ$ ) on the 1 March 2008. As we discussed earlier, the ambiguity of the PCC analysis over homogeneous surfaces on the right and left side of the AATSR scene in middle panel of Fig. 5, is compensated in the right panel by using additional information from 3.7  $\mu\text{m}$  channel.

- ✓ Line 707-711: Figure 5. Examples of the results of ASCIA on AATSR observations on the scenes over Greenland (upper panels) between (75°N, 48°W), (75°N, 75°W), (81°N, 48°W), (81°N, 75°W), taken on the 18 May 2008 and Svalbard (lower panels) within (75°N, 4°E), (75°N, 32°E), (81°N, 4°E), (81°N, 32°E) (lower panels), on the 1 March 2008, Left panels: RGB images, middle panels: Cloud detection at block level (25×25 km<sup>2</sup>), right panels: cloud detection at scene level.

**Reviewer #2: L16 reflection at 3.7  $\mu\text{m}$**

- ✓ Done.
- ✓ Modification: line 16-17: Subsequently, the reflection at 3.7  $\mu\text{m}$  is used for accurate cloud identification at scene level at either 1 × 1 km<sup>2</sup> or 0.5 × 0.5 km<sup>2</sup>.

**Reviewer #2: L18 e.g. e.g.**

- ✓ Done.
- ✓ Modification: line 17-18: The ASCIA data product has been validated by comparison with independent observations e.g. surface synoptic observations (SYNOP)

**Reviewer #2: L32 Though the attribution of the origins of this phenomenon**

- ✓ Done.
- ✓ Modification: line 32: Though the attribution of the origins of this phenomenon is controversially discussed.

**Reviewer #2: L76 the aim is**

- ✓ Done.
- ✓ Modification: line 79-80: ... where the aim is to simultaneously retrieve aerosol and surface properties.

**Reviewer #2: L104 it is also planned to apply it to the observations acquired by SLSTR**

- ✓ Done.
- ✓ Modification: line 111-112: It is also planned to apply it to the observations acquired by SLSTR onboard Sentinel-3A and Sentinel-3B launched in 2016 and 2018 respectively which provide continuity of AATSR observations.

**Reviewer #2: L123 In the upper right**

- ✓ Done.

- ✓ Modification: line 132-133: For example, in the upper right panel in Fig. 1 the large drop of reflectance over snow/ice created a notable contrast...

**Reviewer #2: L131 Each scene is**

- ✓ Done.
- ✓ Modification: line 140-141: Each scene is imaged twice.

**Reviewer #2: L142 These algorithms are typically not optimized**

- ✓ Done. We deleted this line.

**Reviewer #2: L168 For example, they are almost absent in the central parts**

- ✓ Done.
- ✓ Modification: line 183-184: For example, they are almost absent in the central parts of the Arctic Circle as is shown in Fig. 3.

**Reviewer #2: L187 AERONET is . . .**

- ✓ Done.
- ✓ Modification: line 203-205: AERONET is a network of approximately 700 ground-based sun photometers established by National Aeronautics and Space Administration (NASA) and PHOTométrie pour le Traitement Opérationnel de Normalisation Satellitaire (PHOTONS).

**Reviewer #2: L206 Then the PCC can be written as**

- ✓ Done.
- ✓ Modification: line 222-223: To describe the computational procedure developed, we assume  $x, y$  to be two random variables, then the PCC can be written as...

**Reviewer #2: L207 function of the covariance**

- ✓ Done.
- ✓ Modification: line 223: ...a function of the covariance of  $x$  and  $y$  which is normalized by square root of their variances.

**Reviewer #2: L241 no new line**

- ✓ Modification: line 259.
- ✓ Done.

**Reviewer #2: L254 Here you should compact everything in one sentence**

- ✓ Done.
- ✓ Modification: line 273: where  $R_{3,7}$  is the reflectance i.e. the ratio of scattered radiance to incident solar radiance;  $L$  measured radiance at  $3.7 \mu\text{m}$ ,  $B_{3,7}(T_{11})$  the Planck function radiance (the contribution from

thermal emission at 3.7  $\mu\text{m}$ )  $T_{11}$  measurements at 11  $\mu\text{m}$ ;  $F_{3.7,0}$  the solar constant at 3.7  $\mu\text{m}$  and  $\mu_0$  the cosine of solar zenith angle.

**Reviewer #2: L285 AATSR provides**

- ✓ Done.
- ✓ Modification: line 304: AATSR provides more data over higher latitudes, which increase in spring and summer time due to longer polar days and solar illumination.

**Reviewer #2: L310 found that a PCC of 06**

- ✓ Done.
- ✓ Modification: line 327-329: ...we defined a lower threshold for PCC of 0.4 over the Arctic region and found that a PCC of 0.6 is appropriate for middle latitudes based on a number of statistical analyses.

**Reviewer #2: L319 ASCIA starts looking for remaining small cloud scenes within a block, i.e. scenes . . . (R3.7 >0.04)**

- ✓ Done.
- ✓ Modification: line 338: ASCIA starts looking for remaining small cloud scenes within a block, i.e. scenes with  $R_{3.7} \dots$

**Reviewer #2: L333 it is important to note that one scene, . . .**

- ✓ Done.
- ✓ Modification: line 351: It is important to note that one scene,...

**Reviewer #2: L334 The latter mix with soil and becomes**

- ✓ Done.
- ✓ Modification line 352-353: The latter mix with soil and becomes dark enough to be filtered out from the snow class. Sea-ice is distinguished from water on the basis of its greater brightness...

**Reviewer #2: L339 a representative example**

- ✓ Done.
- ✓ Modification: line 357: A representative example of the block level 25×25 km<sup>2</sup> and scene level 1×1 km<sup>2</sup> results of ASCIA...

**Reviewer #2: L373 cloud free scene which ISTO failed to detect but are correctly labeled by ASCIA.**

- ✓ Done.
- ✓ Modification: line 398-399: On the other hand, reddish scenes show cloud free case which ISTO fails to detect but are correctly labeled by ASCIA as cloud free.

**Reviewer #2: L393 Both the ESA and ISTO**

- ✓ Done.



- ✓ Modification line 416: Both the ESA and ISTO cloud products showed good results for this case with the exception of undetected thin cloud scenes which are falsely labeled as clear snow by ISTO.

**Reviewer #2: L447 would be expected from SYNOP**

- ✓ Done.
- ✓ Modification: line 486-487: As discussed earlier an error of  $\pm 1$  to  $\pm 2$  okta would be expected as the accepted accuracy range from SYNOP cloud cover values due to man-made nature of its observation and viewing conditions

# A cloud identification algorithm over the Arctic for use with AATSR/SLSTR measurements

Soheila Jafariserajehlou<sup>1</sup>, Linlu Mei<sup>1</sup>, Marco Vountas<sup>1</sup>, Vladimir Rozanov<sup>1</sup>, John P. Burrows FRS<sup>1</sup>, Rainer Hollmann<sup>2</sup>

<sup>1</sup>Institute of Environmental Physics, University of Bremen, Otto-Hahn-Allee 1, Bremen, 28359, Germany

<sup>2</sup>DWD – Deutscher Wetterdienst, Frankfurter Straße 135, 63067 Offenbach, Germany

*Correspondence to:* Soheila Jafariserajehlou ([jafari@iup.physik.uni-bremen.de](mailto:jafari@iup.physik.uni-bremen.de))

**Abstract.** The accurate identification of the presence of cloud in the ground scenes observed by remote sensing satellites is an end in itself. Our lack of knowledge of cloud at high latitudes increases the error and uncertainty in the evaluation and assessment of the changing impact of aerosol and cloud in a warming climate. A prerequisite for the accurate retrieval of Aerosol Optical Thickness, AOT, is the knowledge of the presence of cloud in a ground scene.

In this study observations of the upwelling radiance in the visible (VIS), near infrared (NIR), shortwave infrared (SWIR), and the thermal infrared (TIR), coupled with solar extraterrestrial irradiance are used to determine the reflectance. We have developed a new cloud identification algorithm for application to the reflectance observations of Advanced Along-Track Scanning Radiometer (AATSR) on European Space Agency (ESA)-Envisat and Sea and Land Surface Temperature Radiometer (SLSTR) onboard the ESA Copernicus Sentinel-3A and -3B. The resultant AATSR/SLSTR Cloud Identification Algorithm (ASCIA) developed addresses the requirements for the study AOT at high latitudes and utilizes time-series measurements. It is assumed that cloud free surfaces have unchanged or little changed patterns for a given sampling period, whereas cloudy or partly cloudy scenes show much higher variability in space and time. In this method, the Pearson Correlation Coefficient (PCC) parameter is used to measure the ‘stability’ of the atmosphere-surface system observed by satellites. The cloud free surface is classified by analyzing the PCC values at the block scale  $25 \times 25 \text{ km}^2$ . Subsequently, the reflection [at](#)  $3.7 \mu\text{m}$  is used for accurate cloud identification at [the](#) scene level [at](#) either  $1 \times 1 \text{ km}^2$  or  $0.5 \times 0.5 \text{ km}^2$ . The ASCIA data product has been validated by comparison with independent observations e.g. [s](#)Surface synoptic observations (SYNOP), AEROSOL RObotic NETwork (AERONET) and the following satellite-products from i) ESA standard cloud product from AATSR L2 nadir cloud flag, ii) one method based on clear-snow spectral shape developed at IUP Bremen (Istomina et al., 2010), which we call, ISTO, iii) Moderate Resolution Imaging Spectroradiometer (MODIS). In comparison to ground based SYNOP measurements, we achieved a promising agreement better than 95 % and 83 % within  $\pm 2$  and  $\pm 1$  okta respectively. In general, ASCIA shows an improved performance in comparison to other algorithms applied to AATSR measurements for cloud identification at high latitudes.

## 1 Introduction

The large trends in warming over the Arctic in recent decades, has received much attention from the global and regional climate change research community (Wendisch et al., 2017; Cohen et al., 2014). [This study is part of](#)

28 ~~research activities to meet the scientific objectives of Collaborative Research Centers, CRC/Transregio 172 “Arctic~~  
29 ~~Amplification: Climate Relevant Atmospheric and Surface Processes, and Feedback Mechanisms (AC)<sup>3</sup> (Wendisch~~  
30 ~~et al., 2017).~~ A number of studies using global observations and climate models confirm this phenomenon, called  
31 Arctic Amplification and provide evidence that it grows beyond the Arctic (Kim et al., 2017; Cohen et al., 2014).  
32 Though, the attribution of the origins of this phenomenon is controversially discussed (Serreze et al., 2011; Pithan et  
33 al., 2014), cloud cover is well-known to play a role in the Arctic surface-atmosphere radiation balance (Kellogg et  
34 al., 1975; Curry et al., 1996). The accurate identification of Arctic clouds in the ground scenes of remote sensing  
35 measurements made from space is therefore of intrinsic importance. However, cloud screening over the Arctic is a  
36 challenging task. Since, all developed cloud detection methods encounter many obstacles originating from the  
37 unique atmosphere and surface conditions in the Arctic (Curry et al., 1996). The Arctic clouds are mostly optically  
38 thin and low with no remarkable contrast in commonly used visible or thermal or microwave measurements to the  
39 underlying surface covered with highly reflecting snow and ice. For example, snow/ice is also cold – this is the  
40 limiting factor in the thermal infrared (Rossow and Garder 1993; Curry et al., 1996).

41 In addition to the importance of clouds to Arctic Amplification, errors in the identification of cloud in scene are  
42 also one of the major sources of error in retrievals of a variety of data products for both satellite and ground-based  
43 measurements at high latitude. For instance, the interference of cloud contamination in the Aerosol Optical  
44 Thickness (AOT) retrieved by passive satellite remote sensing is a well-known issue (Shi et al., 2014; Várnai and  
45 Marshak, 2015; Christensen et al., 2017; Arola et al., 2017). This limits the reliability and usefulness of the AOT  
46 products in the assessment of the direct/ indirect impact of aerosols in Earth’s energy balance in particular over the  
47 Arctic. To avoid the uncertainty included in AOT products due to significant misclassification of heavy aerosol load  
48 as by thin clouds (which have similar reflectance properties) the development of an adequate cloud identification  
49 algorithm is a prerequisite (Martins et al., 2002; Remer et al., 2012; Wind et al., 2016; Mei et al., 2017a, 2017b;  
50 Christensen et al., 2017).

51 One recent approach to detect cloud-free snow and ice ~~for aerosol retrieval~~ over high latitudes used the spectral  
52 shape of clear snow, ISTO (Istomina et al., 2010). The latter analyses the spectral behavior of each ground scene and  
53 identifies clear snow or ice scenes from Advanced Along-Track Scanning Radiometer (AATSR) measurements.  
54 Thresholds of the reflectance were empirically determined in seven spectral channels from the VIS to TIR. Defining  
55 a reliable threshold which can guarantee a successful separation of cloud and cloud-free regions for the wide range  
56 of atmospheric conditions and surface types is a challenging task. This is because of the similarity between spectral  
57 reflectance of cloud and snow-ice (Lyapustin et al., 2008). In spite of progress made by this approach, adequate  
58 discrimination of thin cloud above ice or snow is an inherent limitation of such threshold based techniques.

59 The European Space Agency (ESA) standard cloud product from AATSR is another example of an existing cloud  
60 data product over the Arctic. This operational cloud mask is called the Synthesis of ATSR Data Into Sea-Surface  
61 Temperature (SADIST) and is based on the latitudinal thresholds for various cloud types (Ghent et al., 2017). ~~The~~  
62 SADIST was initially developed for cloud screening over the ocean (Zavody et al., 2000). Birks et al. (2007)  
63 modified this method to apply it over land. Later, Kolmonen et al. (2013) reported that the cloud flags included in  
64 AATSR product are noticeably restricted and using this cloud product results in aerosol episodes not being observed.

65 | [SADIST is known to misclassify ice, cloud and open ocean in Polar Regions. Bulgin et al. \(2015\) developed a](#)  
66 | [Bayesian approach in ESA's Climate Change Initiative \(CCI\) project to overcome this limitation \(Hollmann et al.,](#)  
67 | [2013\).](#) Sobrino et al. (2016) reviewed different cloud clearing methods including the AATSR operational cloud mask  
68 | in the framework of Synergistic Use of The Sentinel Missions For Estimating And Monitoring Land Surface  
69 | Temperature (SEN4LST) project. ~~They~~ and highlighted the potential uncertainty in different versions of this product,  
70 | which result in these errors being propagated in subsequent data products. For example, the AATSR operational  
71 | cloud mask falsely detects cloud in ~ 16 % of the observations. This is attributed to the flagging of land features  
72 | (such as rivers) incorrectly as cloud (see Sobrino et al., 2013).

73 | To avoid the uncertainty arising from the similarity of spectral characteristics of snow, ice and clouds, we decided  
74 | to develop an algorithm based on a different strategy namely the use of time series measurements. The use of abrupt  
75 | changes of TOA reflectance in time with the aim of cloud identification has been reported previously (Gómez-Chova  
76 | et al., 2017; Lyapustin et al., 2008). An early example of this idea was proposed for low to middle latitudes by  
77 | Rossow and Garder (1993) in the International Satellite Cloud Climatology Project (ISCCP). This method later  
78 | evolved as a part of MultiAngle Implementation of Atmospheric Correction (MAIAC) algorithm (Lyapustin et al.,  
79 | 2008). ~~which MAIAC~~ is mainly designed for use with observations over land (low to middle latitudes), where the  
80 | aim is to simultaneously retrieve aerosol and surface properties. However, it has also been utilized by another study  
81 | to identify snow grain size over Greenland (Lyapustin et al., 2009). Though, further optimization for the Arctic  
82 | region is required and reported, a better performance in comparison to Moderate Resolution Imaging  
83 | Spectroradiometer (MODIS) cloud mask is reported by Lyapustin et al. (2009).

84 | The central assumption used in these algorithms for cloud identification, is that clear-sky reflectance is different to  
85 | that of clouds, which exhibit high variation as a function of time (Lyapustin et al., 2008; Gómez-Chova et al., 2017).  
86 | Knowledge of cloud-free scenes within a given time period, is achieved from knowledge of the variability of the  
87 | measured TOA reflectance. Covariance analysis is used to estimate the spatial coherence. This has a long history in  
88 | remote sensing studies using time series measurements (Leese et al., 1970; Lyapustin et al., 2008). The covariance  
89 | computation assumes changes in the textural patterns of the observed scene, which originate from natural and man-  
90 | made features such as topography, lakes or urban areas (Lyapustin et al., 2008). The use of the covariance analysis,  
91 | which accounts for geometrical structures, minimizes issues originating from illumination variation and results in the  
92 | same algorithm being applicable over both dark and bright surfaces (Lyapustin et al., 2008). For these reasons we  
93 | decided to use Pearson Correlation Coefficient (PCC) as a function of covariance value for cloud detection over the  
94 | Arctic. However, Lyapustin et al. (2008) reported that in spite of relative good performance, the covariance itself is  
95 | not alone adequate for cloud identification in the case of homogenous surfaces or thin clouds. Therefore, we decided  
96 | to use a combination of a PCC analysis and the reflectance of solar radiation at 3.7  $\mu\text{m}$ . The latter utilizes the  
97 | contrast between cloud and underlying surface making it possible to distinguish cloud-free snow and ice.

98 | Another argument in favor of the use of time series analysis is the availability of multiple images by the AATSR  
99 | and Sea and Land Surface Temperature Radiometer (SLSTR) sensor over the Arctic. For AATSR the revisit time of  
100 | 3-4 days over mid-latitudes (Kolmonen et al., 2016) with more frequent at higher latitude which increase to 2 days  
101 | over the Arctic (Soliman et al., 2012; Mei et al., 2013). [In addition, the shorter time interval between satellites over-](#)

102 [passes over the same scene provides images with less variability in the observed cloud-free areas which the](#)  
103 [algorithm looks for](#). For the two SLSTR, ~~the revisit time is~~ 0.9 days at the equator (Coppo et al., 2010) [and this](#)  
104 [time becomes even shorter at](#) ~~with these values increasing at~~ higher latitudes due to orbital convergence.

105 The AATSR/SLSTR Cloud Identification Algorithm (ASCIA) has been developed [as a part of research activities](#)  
106 [to meet the scientific objectives of Collaborative Research Centers, CRC/Transregio 172 “Arctic Amplification:](#)  
107 [Climate Relevant Atmospheric and SurfaCe Processes, and Feedback Mechanisms \(AC\)<sup>3</sup> project \(Wendisch et al.,](#)  
108 [2017\)](#). ~~for use in the (AC)<sup>3</sup> project (Wendisch et al., 2017)~~. The project aims to identify, investigate and evaluate  
109 parameters and feedback mechanisms which contribute to Arctic ~~A~~amplification (Wendisch et al., 2017).  
110 Consequently, a long-term data record of AOT and cloud is required. It is planned to use ~~the~~ ASCIA to identify  
111 cloud free scenes for AOT retrieval. It is also planned to ~~be~~ apply ~~itied~~ to the observations [acquired](#) by ~~the~~ SLSTR  
112 onboard Sentinel-3A and Sentinel-3B launched in 2016 and 2018 respectively which provide continuity of AATSR  
113 observations.

114 A full description of the new cloud identification and its application to AATSR data is presented in the following  
115 sections of this manuscript. First, a brief data description is presented in Sect. 2. The theory and methodology, used  
116 in our new ASCIA, are discussed in detail in Sect. 3 [and 4](#). We evaluated the performance of ~~the~~ ASCIA by  
117 comparison of the cloud identification with that of the ESA standard cloud product for AATSR level2 nadir cloud  
118 flag while ASCIA is also applied to AATSR nadir observations, those obtained by applying ISTO, the MODIS cloud  
119 mask, the Surface synoptic observations (SYNOP) and the AErosol RObotic NETwork (AERONET). The results of  
120 the comparisons with five different ~~sources~~[sources](#) of cloud data are reported in Sect. [56](#). A discussion and set of  
121 conclusions, drawn from the study, are presented in Sect. [67](#).

## 122 2 Instruments and Data

### 123 2.1 AATSR data

124 The AATSR [sensor](#) flown on board polar orbiting Envisat was primarily designed for measuring Sea Surface  
125 Temperature (SST) with accuracy higher than 0.3 K. ~~after~~ [As the successor of](#) ATSR-1 and ATSR-2 on European  
126 Remote Sensing-1, ERS-1 and ERS-2, (<http://envisat.esa.int/handbooks/aatsr/CNTR.html>). ~~The~~ AATSR delivered  
127 data from March 2002 until Envisat failed in 2012 (<http://envisat.esa.int/handbooks/aatsr/CNTR.html>). The unique  
128 design of spectral coverage of AATSR enabled this sensor to measure reflected and emitted radiances in the VIS,  
129 (0.55  $\mu\text{m}$ , 0.66  $\mu\text{m}$ ), NIR (0.87  $\mu\text{m}$ , 1.6  $\mu\text{m}$ ) and three TIR channels (3.7  $\mu\text{m}$ , 10.85  $\mu\text{m}$ , 12.00  $\mu\text{m}$ ) with spatial  
130 resolution of  $1 \times 1 \text{ km}^2$  at nadir view and swath wide of 512 km. In Fig. 1 one example of the AATSR image over  
131 Svalbard is shown. It comprises three different wavelengths to highlight different information, which one can gain  
132 from the wide spectral coverage of this instrument. For example, in [the](#) upper right panel in Fig. 1 the large drop of  
133 reflectance over snow/ice created a notable contrast between the cloud and the underlying surface at this wavelength  
134 in comparison to that found from the VIS channels used in the R(0.66  $\mu\text{m}$ ) G(0.87  $\mu\text{m}$ ) B(0.55  $\mu\text{m}$ ) image. A similar  
135 separation of snow/ice and cloud is observed in the reflectance at 3.7  $\mu\text{m}$  shown in the lower left panel in Fig. 1.  
136 However, at the longer wavelength of 11  $\mu\text{m}$  thin cloud patterns appear in the south-western scenes close to and  
137 above Svalbard, which have small signatures in the shorter wavelength. Combining the information from the

138 different channels in an appropriate way enables the presence of cloud in the ground scenes to be accurately  
139 identified.

140 The conical imaging geometry of AATSR yields the dual viewing capability of this sensor. Each scene ~~is~~  
141 imaged twice. The first measurement of the ground scenes is in the forward direction at a viewing angle of 55°. The  
142 second occurs 150 sec later at a near-nadir viewing angle. This capability is a design feature of AATSR to deliver an  
143 optimal and accurate atmospheric correction and thereby invert an accurate surface reflectance. The two views  
144 theoretically yield independent information about atmosphere and the surface to be retrieved.  
145 (<http://envisat.esa.int/handbooks/aatsr/CNTR.html>). The dual view approach intrinsically provides more information  
146 than the single view for the study of surfaces with complex reflectance characteristics, such as snow and ice  
147 (Istomina, 2012).

148 ~~— Examples of AOT algorithms applied to AATSR data are as follows: the AATSR Dual View algorithm (ADV)~~  
149 ~~which was initially proposed by Veeffkind et al. (1999) and AATSR single view algorithm (ASV) by Veeffkind et al.~~  
150 ~~(1998), the Swansea University (SU) algorithm (North et al., 1999) and Oxford RAL Aerosol and Cloud retrieval~~  
151 ~~(ORAC) algorithm (Thomas et al., 2009). These algorithms typically not optimized for the retrieval of AOT at high~~  
152 ~~latitudes. As the first task in delivering an algorithm, which delivers AOT at high latitude, the new ASCIA has~~  
153 ~~been applied to AATSR measurements to identify cloud and cloud free ground scenes. has been applied to AATSR~~  
154 ~~measurements.~~

## 155 2.2 SLSTR data

156 ~~The~~ SLSTR on-board Sentinel-3A was launched on the 16<sup>th</sup> February in 2016 as the successor of AATSR series to  
157 provide the continuity of long term SST measurements. The Sentinel-3B satellite, which contains an identical  
158 payload, was also launched by a Rockot/Breeze-KM launch vehicle from the Plesetsk Cosmodrome in northern  
159 Russia, on the 25<sup>th</sup> April 2018. The design of the SLSTR instrument has some significant improvements with respect  
160 to ATSR (Coppo et al., 2010). For example, the swath width of single view and dual view was increased from 500  
161 km to 1420 km and 750 km respectively. This yields global revisit times of 1.9 days at ~~the~~ equator ~~with two~~  
162 ~~satellites for the dual view~~ and ~~0.9 4~~ day ~~with one satellite for the single view~~. There are measurements of two  
163 additional channels in the SWIR, at the wavelengths of 1.37  $\mu\text{m}$  and 2.25  $\mu\text{m}$ , which are used to provide more  
164 accurate cloud, cirrus and aerosol information and used to correct for atmospheric radiative transfer effects in the  
165 determination of surface reflectance (Coppo et al., 2010). The Fig. 2 upper right panel shows the use of the new 1.37  
166  $\mu\text{m}$  measurements to detect thin cirrus clouds, which are only weakly identified in reflectance at 3.7  $\mu\text{m}$  shown in  
167 Fig. 2. ~~The current design of ASCIA does not yet include 1.37  $\mu\text{m}$  measurements. Since~~As the radiance and TOA  
168 reflectance at this wavelength are not measured by AATSR, ~~and because of~~ ~~In addition, SLSTR data at this~~  
169 ~~wavelength currently have unresolved calibration issues. in SLSTR data, the current design of ASCIA does not yet~~  
170 ~~include 1.37  $\mu\text{m}$  measurements. In addition, water vapor absorption above and within clouds is considered as an~~  
171 ~~obstacle in using this channel for cirrus detection (Meyer et al., 2010).~~ Nevertheless, the use of the measurements at  
172 this wavelength in thin cirrus detection should improve the performance of ASCIA in future. SLSTR also has a  
173 higher spatial resolution of  $0.5 \times 0.5 \text{ km}^2$  in the VIS and SWIR measurements and two channels dedicated to fire

174 detection (Coppo et al., 2010). The use of the observations from SLSTR and AATSR enables a long-term time  
175 series of clouds and aerosol parameters including AOT over the Arctic to be derived. There is a ~4 years gap  
176 between the failure of AATSR and the launch of SLSTR. To fill this gap, we will apply the algorithm to the  
177 Advanced Very High Resolution Radiometer (AVHRR) sensor carried by National Oceanic and Atmospheric  
178 Administration (NOAA).

## 179 **2.3 Data used in the cloud identification comparison studies**

### 180 **2.3.1 SYNOP**

181 The SYNOP have been provided by World Meteorological Organization (WMO) with the purpose of mapping large  
182 scale weather information around the world. However, the availability of the data is limited in the Arctic studies due  
183 to the coverage of SYNOP stations in this region. For example, they ~~re~~ are almost absent in the central parts of the  
184 Arctic Circle as is shown in Fig. 3. The SYNOP measurements made by an observer or automated fixed stations are  
185 available in a standardized layout of numerical code which is called FM-12 by WMO (1995). The SYNOP reports  
186 include a variety of meteorological parameters such as temperature, barometric pressure, visibility etc. as well as  
187 cloud amount which are observed at synoptic hours simultaneously throughout the globe. We used SYNOP cloud  
188 fraction, which have a temporal resolution of 1-3 hours, to evaluate the performance of our new developed ASCIA  
189 over the Arctic region.

190 The use of SYNOP measurements to validate a cloud identification algorithm, or for that matter the cloud  
191 predicted by a climate model, the fact that the SYNOP cloud fraction is reported in okta scale, has to be  
192 appropriately taken into account. ~~which ranges from 0 (completely clear sky) to 8 (completely obscured by clouds)~~  
193 ~~has to be appropriately taken into account.~~ Converting discrete okta values, which ranges from 0 (completely clear  
194 sky) to 8 (completely obscured by clouds) to continuous percentage ones has been done in different ways by  
195 climatologists. A common assumption is that 1 okta equals 12.5 % of cloud coverage (Boers et al., 2010; Kotarba,  
196 2009). For use in this study it was necessary to make an estimate of the error or uncertainty in the okta in  
197 measurements. It is assumed that the man-made nature of cloudiness okta estimation have errors of  $\pm 1$  okta and even  
198 larger values of  $\pm 2$  okta in the non 0 or 8 okta situations (Boers et al., 2010; Werkmeister et al., 2015). Boers et al.  
199 (2010) suggested defining a larger range of 18.75 % for 1 okta instead of commonly used value of 12.5 %. We used  
200 this approach and defined percentage of cloud values for each okta, which are given in Table 1. More details about  
201 validation procedure are provided in Sect. 6.

### 202 **2.3.2 AERONET**

203 ~~The~~ AERONET is a network of approximately 700 ground-based sun photometers established by National  
204 Aeronautics and Space Administration (NASA) and PHOTométrie pour le Traitement Opérationnel de Normalisation  
205 Satellitaire (PHOTONS). This globally distributed network aims to provide long-term and continuous measurements  
206 of AOT, inversion products and perceptible water in diverse aerosol regimes (Holben et al., 1998). The high  
207 temporal resolution of 15 minutes of these data, expected low accuracy of  $\sim 0.01$  to  $0.021$  (Eck et al., 1999) as well  
208 as readily accessible public domain database provides a suitable dataset for aerosol research and characterization.



209 AERONET data are categorized and available in 3 levels: Level 1.0 (unscreened), Level 1.5 (cloud screened and  
 210 quality controlled) and level 2.0 (quality assured). The data used in this work are selected from Level 1.5 to validate  
 211 cloud identification results from newly developed ASCIA. More details of validation procedure are discussed in  
 212 Sect. 6.

### 213 3 Theoretical background

#### 214 3.1 Pearson Correlation Coefficient (PCC)

215 The PCC was proposed by Karl Pearson (1896) and is used in this study as an indicator of the correlation between  
 216 sequential AATSR measurements. The PCC is also known as the Pearson Product-Moment Correlation  
 217 Coefficient (PPMCC). It is a standard dimensionless statistical parameter commonly used to measure the strength  
 218 and direction of the linear association between a pair of variables (Benesty et al., 2009). This parameter has  
 219 extensively been used in many studies which pursue pattern analysis and recognition.

220 Our use of the PCC analysis is to separate the surface reflectance at a given viewing angle, which is stable over  
 221 short time periods, from the cloud reflectance, which is highly variable over short time period. To describe the  
 222 computational procedure developed ~~here, we let~~ assume  $x$ ,  $y$  ~~to be as~~ two random variables, then ~~the~~ PCC can be  
 223 written as a function of ~~the~~ covariance of  $x$  and  $y$  which is normalized by square root of their variances (Rodgers et  
 224 al., 1988; Benesty et al., 2009):

$$PCC = \frac{COV(x, y)}{\sigma_x \sigma_y}, \quad (1)$$

225 where  $COV(x, y)$  is the covariance of variables and  $\sigma$  is the root-mean-square variations of each random variables  
 226 (Rodgers et al., 1988; Benesty et al., 2009):

$$COV(x, y) = \frac{1}{N^2} \sum \sum (x_i - \bar{x})(y_i - \bar{y}) \text{ and } \sigma_x^2 = \frac{1}{N^2} \sum_{i=1}^N (x_i - \bar{x})^2, \quad (2)$$

$$PCC = \frac{\sum (x_i - \bar{x})(y_i - \bar{y})}{(\sum (x_i - \bar{x})^2 \sum (y_i - \bar{y})^2)^{1/2}}, \quad (3)$$

227 where  $\bar{x}$  and  $\bar{y}$  are the mean value of  $x$  and  $y$  variables respectively. The correlation coefficient parameter has values  
 228 between -1 and +1 (Rodgers et al., 1988). The PCC values were prepared in this study. The association between the  
 229 two variables is stronger if the absolute value is closer to 1, whereas if two variables are independent or in another  
 230 word “uncorrelated” PCC value will become 0 (Benesty et al., 2009). As a consequence of the above the PCC values  
 231 computed between several data pairs for ground scenes of the same area at different times provide an indication of  
 232 whether the scene is cloud covered or free of clouds.

233 For this aim, the use of all seven channels (0.55  $\mu\text{m}$ , 0.66  $\mu\text{m}$ , 0.87  $\mu\text{m}$ , 1.6  $\mu\text{m}$ , 3.7  $\mu\text{m}$ , 11 and 12  $\mu\text{m}$ ) was  
 234 investigated. The visible channels (0.55  $\mu\text{m}$ , 0.66  $\mu\text{m}$ ) on their own are not optimal to separate cloud free form  
 235 cloudy scenes, in particular for thin clouds. The SWIR and TIR such as 1.6  $\mu\text{m}$  and beyond, where liquid water and



236 ice absorb provide useful information. There is a large reduction of reflectance between clear snow/ice as compared  
237 to clouds between 0.87  $\mu\text{m}$  and 1.6  $\mu\text{m}$  (Kokhanovsky, 2006). Our routine takes advantage of this contrast through  
238 the PCC calculation. ~~One major contributors of error in aerosol retrieval is misclassifying heavy aerosol loads with~~  
239 ~~clouds~~ One of the major contributors to error in aerosol retrievals is misclassification of heavy aerosol loads as  
240 cloud. Using 1.6  $\mu\text{m}$  reflectance which is less affected by aerosols than visible wavelengths addresses in part this  
241 issue (Lyapustin et al., 2008).

242 A second question in PCC analysis (after wavelength selection) is definition of the optimal size of the block of  
243 ground scene for PCC calculation. In early version of current algorithm, we set up  $10\times 10\text{ km}^2$  as the block size.  
244 Since aerosol retrieval would be carry out with the same spatial resolution. However, our investigations and  
245 previous studies show that  $10\times 10\text{ km}^2$  is not sufficient to capture surface patterns. Thus, blocks of  $25\times 25\text{ km}^2$  area  
246 as proposed in previous studies (Lyapustin et al., 2008) were used. The implementation of PCC analysis as used in  
247 this study is discussed in more detail in Sect. 4.

### 248 3.2 Reflectance of 3.7 $\mu\text{m}$ thermal infrared channel

249 The reflectance part of TIR Channels at 3.7  $\mu\text{m}$  and 3.9  $\mu\text{m}$  have been used in different studies to determine cloud  
250 properties such as cloud effective radius and thermodynamic phase of the cloud or to discriminate cloud and  
251 snow/ice covered surface (Meirink et al., 2016; Klüser et al., 2015; Musial et al., 2014; Khlopenkov, et al., 2007;  
252 Pavolonis et al., 2005; Rosenfeld et al., 2004; Spangenberg et al., 2001; Allen et al., 1990). The reason for the wide  
253 application of this channel in cloud identification methods is the difference in Single Scattering Albedo (SSA) at this  
254 band compared to shorter VIS and INR wavelengths, which in turn results from the significant sensitivity of SSA to  
255 thermodynamic phase and particle size of clouds (Platnick et al., 2008). For example, the scattering of liquid clouds,  
256 having small droplets, is relatively larger than absorption and the ratio of NIR/VIS reflectance approaches 1. But  
257 ~~while~~ in the case of large liquid droplets or ice particles, the absorption increases and this ratio is closer to zero  
258 (Platnick et al., 2008).

259 —In addition, cloud-free snow reflects at a relatively weak level in comparison to clouds at 3.7  $\mu\text{m}$  channel (Derrien  
260 et al., 1993; Platnick et al., 2008). Therefore, the contrast due to different physical properties and radiance of  
261 snow/ice and cloud at 3.7  $\mu\text{m}$  makes the use of this channel advantageous for the identification of clouds. During  
262 daytime, the measured Brightness Temperature (BT) at 3.7  $\mu\text{m}$  is determined from the upwelling radiation which  
263 comprises both reflected or scattered solar radiation and the thermal emission from the surface (Musial et al., 2014).  
264 To use TOA reflectance at 3.7  $\mu\text{m}$ , procedures are needed to account for and subtract the emission portion of  
265 measured BT at 3.7  $\mu\text{m}$  wavelength (Allen et al., 1990). To achieve this goal independent information about the  
266 surface TIR is needed. This is estimated from observations at 11  $\mu\text{m}$  where absorption by water vapor and other  
267 trace gases is ~~very small~~; most objects-phenomena in regions outside of the tropics can be treated ~~behave~~ as  
268 blackbodies and the measured BT considered being in good agreement with ~~as the~~ real surface temperature  
269 (Istomina et al., 2010; Musial et al., 2014).

270 To do that, we use the method described in Meirink et al. (2016) and Musial et al. (2014), where the reflectance of  
271 3.7  $\mu\text{m}$  can be written as:

$$R_{3.7} = \frac{L_{3.7} - B_{3.7}(T_{11})}{\mu_0 F_{3.7,0} - B_{3.7}(T_{11})}, \quad (4)$$

where  $R_{3.7}$  is the reflectance i.e. the ratio of scattered radiance to incident solar radiance;  $L_{3.7}$  is measured radiance at  $3.7 \mu\text{m}$ ;  $B_{3.7}(T_{11})$  is the Planck function radiance (the contribution from thermal emission at  $3.7 \mu\text{m}$ ) is the Planck function radiance  $B_{3.7}(T_{11})$  estimated from the temperature value obtained from the  $T_{11}$  measurements at  $11 \mu\text{m}$ ;  $F_{3.7,0}$  is the solar constant at  $3.7 \mu\text{m}$  and which is weighted by  $\mu_0$  as the cosine of solar zenith angle.

Theoretical reflectance values at  $3.7 \mu\text{m}$  band, computed by Allen et al. (1990) have been compared to satellite measurements at the same channel from Advanced Very High Resolution Radiometer (AVHRR). The results of this work are summarized in Table 2. According to this study, the reflectance of liquid clouds primarily depends on droplet size and solar zenith angle, whereas for ice clouds, ice particle shape and size distribution are of great importance together with Cloud Optical Thickness (COT) and sun-satellite geometry. The observed reflectance is reported in a range of 0.08 to 0.36 for liquid clouds and 0.02 to 0.27 for ice clouds (Allen et al., 1990). Arking and Childs (1985) calculated  $3.7 \mu\text{m}$  reflectance for ice clouds which varies between 0.01 to 0.30 for the COT of 0.1 to 100 and ice crystal effective radius of  $2 \mu\text{m}$  to  $32 \mu\text{m}$ , solar zenith angle of  $60^\circ$ . Spangenberg et al. (2001) reported a typical value of 0.04 to 0.4 for clouds. In the case of snow covered surface  $3.7 \mu\text{m}$  reflectance is dependent on many factors including snow grain size, solar zenith angle, liquid water content, snow impurities and etc. Considering the snow grain size of  $50 \mu\text{m}$  to  $200 \mu\text{m}$ , with a solar zenith angle of  $40^\circ$  to  $80^\circ$ , the modeled values for snow reflectance varies between 0.005 and 0.025 at  $3.7 \mu\text{m}$  (Allen et al., 1990). However, a range of 0.02 to 0.04 is observed from the satellite measurements over the same wavelength for snow cover. This difference between model calculations and measurements is explained by snow impurities (Allen et al., 1990). For land areas, the  $3.7 \mu\text{m}$  reflectance is impacted by soil type, vegetation type, coverage and moisture content. An average value of 0.15 is derived for clear sky land scenes at  $3.7 \mu\text{m}$  (Allen et al., 1990). In order to use the remarkable contrast between snow cover and clouds at  $3.7 \mu\text{m}$  channel, two main issues have to be taken into account: 1) the interference between snow and ice-cloud values; 2) the interference between cloud and land reflectance. The latter is easily solved by using information from visible channels with  $3.7 \mu\text{m}$  reflectance. This is because land scenes in Polar region are dark in comparison to cloud and snow. The first issue, discriminating ice clouds from snow is a challenging task. To detect ice clouds, we combined  $3.7 \mu\text{m}$  reflectance with PCC analysis. A full description of this new method is given in Sect. 4.

#### 4 Methodology

The ASCIA implementation is initiated by preparing a time series of data. A time span of one month for the ground scene was selected. Hagolle et al. (2015) indicated that in Sentinel-2 measurements with revisit time of 5 days, most of the given scenes would be observed cloud-free at least once a month. Consequently, we also assume that every scene of AATSR measurements, which have a higher revisit time of 3 days, will be cloud-free at least once a month.

Depending on the latitude and the time of year the number of downloaded data varies from 10 to 50 or more over the same scene. AATSR provides more data over higher latitudes, which increase in spring and summer time due to longer polar days and solar illumination. The AATSR L1b data are already provided as gridded and calibrated  $1 \times 1$

305 km<sup>2</sup> scenes, which include geo-location information interpolated from the tie point scenes which are equally  
306 distributed across a single AATSR image (<http://envisat.esa.int/handbooks/aatsr/CNTR.html>). Therefore, there is no  
307 necessity to re-grid them for geo-referencing step which is considered as an advantage to preserve the original  
308 reflectance value of each scene for following steps. However, the time series data are acquired by the satellite from  
309 different viewing geometries. To compute PCC values over the same areas from different days, ~~the~~ ASCIA looks for  
310 the closest similar scenes using geo-location information provided in the data. The closest distance is often found to  
311 be within 0.006 degree and increases to 0.01 degree in the worst case and thus of negligible significance. After  
312 finding the same blocks over different dates and building blocks, ~~the~~ ASCIA comprises two main parts: i) PCC  
313 analysis at 1.6 μm; ii) Applying thresholds on reflectance of 3.7 μm channel.

314 In the first step, a PCC analysis for a block of ground scenes (25×25 km<sup>2</sup>) is used to identify cloud and cloud-free  
315 blocks which are assumed to have low and high PCC values respectively. The output of this step is a binary flag at  
316 the block level. This serves as input for the second step to produce at ground scene level (1×1 km<sup>2</sup> or 0.5×0.5 km<sup>2</sup>  
317 depending on spatial resolution of instrument) cloud identification, by using the knowledge of the reflectance of  
318 solar radiation at 3.7 μm channel. The combination of these two constraints is necessary because neither PCC  
319 analysis nor reflectance part of 3.7 μm channel is adequate on its own for accurate cloud detection. A high PCC  
320 value cannot guarantee the clearness of the whole block of scenes (Lyapustin et al., 2008) because some ground  
321 scenes may still contain clouds, which are not enough in number to decrease significantly the PCC value. This case  
322 occurs frequently over small or semitransparent clouds where the textural pattern of surface is still observable  
323 through the clouds (Lyapustin et al., 2008). Small PCC values may be caused by ~~a~~ rapid surface change, ~~or~~ high  
324 aerosol load or ~~the~~ lack of recognizable spatial pattern, which is often the case over homogenous snow covered  
325 surface (Lyapustin et al., 2008). A PCC value of 0.63 is suggested by Lyapustin et al. (2008) to separate cloud-free  
326 blocks over middle latitudes. Considering less surface patterns in a large area of the Arctic compared to lower  
327 latitudes, and our PCC analysis over both middle and high latitudes, we defined a lower threshold ~~for~~ PCC of 0.4  
328 over the Arctic region and found that ~~at~~ the PCC of 0.6 is appropriate for middle latitudes based on a ~~large~~ number of  
329 statistical analyses.

330 After computing the first binary cloud flag at block level using the last measurement and one previous image, ~~the~~  
331 ASCIA keeps the result in memory and repeats the procedure with second previous data and so on, until the last  
332 measurement of the data series is involved ~~in PCC analysis~~. The final binary blocks are imported through the second  
333 step to identify cloudy scenes based on thresholds defined for blocks with low and high PCC value differently.  
334 However, we would like to underline that, the snow/ice reflectance at 3.7 μm channel (~0.005-0.025) has  
335 interference with those of ice clouds (0.01-0.3) at this wavelength. To avoid the uncertainty arising from this  
336 problem we defined the PCC analysis as a decision point of ASCIA requiring further optimized analysis:

337 (i) For the high PCC ≥ 0.4, the whole block is considered to be cloud free and then ~~the~~ ASCIA starts looking for  
338 remaining small cloud scenes within a block, i.e. scenes with  $R_{3.7}$  larger than the maximum value observed  
339 over snow at 3.7 μm:  $R_{3.7} > 0.04$ , (Allen et al., 1990).

(ii) For  $PCC < 0.4$ , the block is assumed to be cloudy; ASCIA removes all scenes within the block and only keeps scenes which satisfy the  $R_{3.7} < 0.015$  test. This threshold is equal or lower than the lowest observation of ice cloud reflectance at  $3.7 \mu\text{m}$  (Allen et al., 1990).

In our method, PCC analysis constrains the procedure and strict decision is only made within low PCC blocks. The loss of some clear scenes in low PCC blocks is an unavoidable side effect of using strict criteria in particular over land scenes, having low PCC and high  $3.7 \mu\text{m}$  reflectance values. However, the ASCIA detects the presence of thin cirrus cases with a relatively high confidence level. A schematic flowchart of the ASCIA is shown in Fig. 4, with the use of the two main constraints being highlighted. In addition to picking out clear scenes, a simple land classification procedure is undertaken in this step of the ASCIA. Snow/ice scenes are identified with low  $3.7 \mu\text{m}$  reflection whereas land scenes with high reflection are classified with the aid of the darkness test over visible channels. The corresponding thresholds for land classification scheme are described in the Table 3.

It is important to note that if one scene, although characterized as land, may include soil, different types of vegetation cover or even melting snow. The latter mix with soil and becomes dark enough to be filtered out from the snow class. Sea-ice is distinguished from water on the basis of its greater/higher brightness; one scene might be white enough to be considered as ice. However, melting or broken ice as well as new ice would not be labeled as ice. Snow over sea-ice is not distinguished from pure sea-ice and both of them are labeled as sea-ice. This also means that ice over land is also marked as snow as well as pure snow.

A representative examples of the block level ( $25 \times 25 \text{ km}^2$ ) and scene level ( $1 \times 1 \text{ km}^2$ ) results of the ASCIA applied to AATSR observations is shown in Fig. 5. This example was selected to show the performance of ASCIA in presence of different surface conditions: 1) one scene is over a combination of fairly homogenous snow cover, land, ocean, sea-ice and cloud scene at north-west of Greenland taken on the 18 May 2008; 2) another example is over a surface with highly variable topography over Svalbard with relatively higher solar zenith angle ( $> 80^\circ$ ) on the 1 March 2008. ~~on the scenes within the region over northwest of Greenland in spring time enclosed in the coordinates for four corners ( $75^\circ\text{N}$ ,  $48^\circ\text{W}$ ), ( $75^\circ\text{N}$ ,  $75^\circ\text{W}$ ), ( $81^\circ\text{N}$ ,  $48^\circ\text{W}$ ), ( $81^\circ\text{N}$ ,  $75^\circ\text{W}$ ) taken on the 18 May 2008 are shown in Fig. 5. This example selected to show the performance of ASCIA over a combination of fairly homogenous snow cover, land, ocean, sea-ice and cloud.~~ As we discussed earlier, the ambiguity of the PCC analysis over homogeneous surfaces on the right and left side of the AATSR scene in middle panel of Fig. 5, is entirely compensated in the right panel by using additional information from  $3.7 \mu\text{m}$  channel. ~~Another example over a surface with highly variable topography in March with relatively higher solar zenith angle ( $> 80^\circ$ ) is selected over Svalbard enclosed in the coordinates for four corners ( $75^\circ\text{N}$ ,  $4^\circ\text{E}$ ), ( $75^\circ\text{N}$ ,  $32^\circ\text{E}$ ), ( $81^\circ\text{N}$ ,  $4^\circ\text{E}$ ), ( $81^\circ\text{N}$ ,  $32^\circ\text{E}$ ) taken on the 1 March 2008.~~

## 5 Results and validation

### 5.1 The comparison to space-borne products

In this study, we applied our recently developed ASCIA to identify cloud in the scenes using AATSR L1b (TOA reflectance) and SLSTR L1b gridded data. The input file to the process chain is one scene of AATSR L1b product the output comprises 5 classes of surface types including snow/ice, sea ice, water, cloud and land. The procedure of

376 surface classification is explained in Sect. 4. The location and time of selected case studies are used to show that the  
377 identification of cloud by our new ASCIA is adequate. In this regard, the AATSR data are selected from several  
378 years starting from 2006, during strong Arctic haze episode, which originated predominantly from agricultural fires  
379 burning in Eastern Europe. The event has been reported in previously (Law et al., 2007). A second episode in 2008  
380 is also considered for which validation data are available from SYNOP stations. ~~Three~~One months of data from ~~the~~  
381 ~~targeted seasons spring, summer and autumn vis.~~ March, May, and July ~~respectively~~ have been acquired over  
382 Greenland and Svalbard to assess the performance of ~~the~~ ASCIA in a wide range of solar zenith angles (60°-85°),  
383 surface and atmospheric conditions observed at high latitudes. In order to ~~take into account~~ various surface types in  
384 the Arctic take into account, we selected case studies including, highly variable topography and fairly homogenous  
385 snow cover, coast lines, land and ocean along snow and ice covered surface. The designed criteria for ~~the~~ ASCIA  
386 are optimized for ~~an over~~ various regions ~~over~~ of the Arctic ~~observed under~~ in different solar illumination conditions.  
387 Polar night and transition seasons at low light conditions are excluded from our retrievals. ~~with the exception of the~~  
388 ~~dark winter period.~~ The results obtained are compared with i) the AATSR L2 nadir cloud flag and ii) those results  
389 obtained with ISTO (Istomina et al., 2010) and iii) MODIS.

390 As we discussed in Sect. 1, misclassifying thin cirrus cloud with clear snow is reported as an unresolved problem  
391 of ISTO approach. Two representative scenarios of this problem are illustrated in Fig. 6 and Fig. 7 over Greenland  
392 and Svalbard respectively in which thin cloud is detected as clear snow by the ISTO method whereas ASCIA  
393 confirmed the presence of cloud. In fact, over such a homogenous surface like Greenland, the second step of ~~the~~  
394 ASCIA plays the main rule. Since, the lack of structural patterns on surface lead to low PCC values in first step and  
395 consequently overestimation of cloudy scenes. However, the reflection part of 3.7  $\mu\text{m}$  could help to label and bring  
396 back clear homogenous surface as cloud free snow in second step. The right panel in Fig. 6 and 7 shows the  
397 difference between the result of ASCIA and ISTO. In this panel, the dark blue scenes show clouds which are not  
398 detected by ISTO while ~~the~~ ASCIA could identify them sufficiently. On the other hand, reddish scenes show cloud  
399 free ~~cases~~ scenes which ISTO failed to detect ~~them~~ but are correctly labeled by the ASCIA ~~labeled them~~ as cloud  
400 free. As we can see, in addition to the edge of clouds which are difficult to detect specially over snow and ice, we  
401 have a remarkable number of undetected cloud scenes in ISTO results which are identified successfully by ~~the~~  
402 ASCIA. However, for the rest of these two scenes, both of two algorithms show a promising agreement.

403 The ESA cloud product from L2 data, shows a significant overestimation of clouds which leads to missing clear  
404 snow and ice scenes. The tendency of this product to flag clear scenes as cloud is also visible in Fig. 6, 7. The results  
405 in Fig. 8 show undetected clouds as another problem of AATSR level 2 cloud product, which happens frequently in  
406 conditions with high solar zenith angle ~~winter time~~. To have a better understanding of this misclassification, we  
407 validated the AATSR L2 nadir cloud flag against SYNOP measurements and results are described in Sect. 6.

408 The lack of good performance in cases ~~winter time~~ over the Arctic with high solar zenith is observed in all of the  
409 results using ISTO method. Figure 8 is an example over Svalbard in March 2008. Over such a highly variable  
410 surface type like Svalbard, reflection part of 3.7  $\mu\text{m}$  could approach the highest values such as 0.035, which is  
411 similar to that from cloud reflection. In this difficult case, PCC analysis is of great importance to keep cloud free  
412 snow scenes from the strict criteria of second step in particular in cases ~~winter time~~ with higher solar zenith angle.

413 | ~~The~~ ASCIA in high PCC block accounts a wide range of solar zenith angle (40-80 degree) and results in the  
414 | reflectance of snow/ice being defined as between 0.02 and 0.04 at 3.7  $\mu\text{m}$  channel. On the right panel, one can see  
415 | the large number of red scenes which are falsely detected as cloud in the ISTO method.

416 | Figure 10 shows one example of a haze event over Svalbard on 3<sup>rd</sup> of May, 2006. Both ~~the of~~-ESA and ISTO  
417 | cloud products ~~showed~~ had good ~~results~~ performance for this case with the exception of ~~the~~ undetected thin cloud  
418 | scenes which are falsely ~~labeled~~ detected as clear snow by ~~the~~ ISTO. In fact, the appropriate design and application  
419 | of PCC analysis over 1.6  $\mu\text{m}$  enables cloud to be discriminated from heavy aerosol load. However, aerosol load over  
420 | cloud could not be separated from cloudy scenes.

421 | The only season, in which all three approaches detected clouds with similar success, was summer in July as  
422 | shown in Fig. 9. Although ASCIA shows an overall better performance in particular for thin clouds, the required  
423 | computational time for cloud detection and surface classification is higher than two other methods. In addition, we  
424 | compared our results with those from the MODIS cloud identification algorithm used for masking clouded scenes.  
425 | As an example, Fig. 11 shows the AATSR scene over Svalbard on 14<sup>th</sup> July 2008, where a large part of sea-ice is  
426 | covered with thin clouds which have a small signature in visible channels. The middle panel shows the MODIS  
427 | cloud mask for the same area. Although there is a small time difference of 15 minutes between MODIS and AATSR  
428 | overpasses, we see that scenes identified with cloud by ASCIA correspond well with those of MODIS.

429 | Figure 12 shows another example over northwest of Greenland on 18 May 2008. The thin and broken clouds are  
430 | well detected over the snow cover by ASCIA, as well as the clouds over the southern part of the scene, which is  
431 | covered with snow and ocean. As we can see from the comparison between ASCIA and MODIS cloud scene  
432 | identification, cloudy scenes in the northern part of scene are not captured by MODIS product but the presence of  
433 | clouds is seen in the RGB image in left panel. We observed other cases with similar differences especially for the  
434 | case of thin and broken clouds. There are two potential sources of these differences, 1) time differences, which are  
435 | 10 minutes in this case, or 2) a proper performance of the MODIS cloud mask over bright surfaces covered by snow  
436 | and ice.

437 | Due to the loss of Envisat and thus AATSR data in 2012, and the need for long time series of data, we tested  
438 | ASCIA on the AATSR successor SLSTR as well. Figure 13 shows some results over Svalbard on the 18<sup>th</sup> April  
439 | 2017. Due to the smaller swath width of AATSR compared to SLSTR, ~~the~~-ASCIA is not applied to the full coverage  
440 | of SLSTR and the selected scene is cropped to have the similar coverage of 500 $\times$ 500  $\text{km}^2$ . In spite of some  
441 | unresolved calibration issues in this sensor, the higher spatial resolution in SLSTR clearly helps to improve cloud  
442 | identification in first step, because the PCC analysis is more sensitive to smaller changes in 0.5 $\times$ 0.5  $\text{km}^2$  scenes  
443 | compared to 1 $\times$ 1  $\text{km}^2$ . Moreover, the shorter revisit time of the Sentinel-3 satellite provides more acquired images  
444 | over the same scene. This results in a larger number of reference images, compared to those from Envisat. Overall  
445 | these effects result in ~~the ASCIA an expected improved~~ application on SLSTR data ~~being improved to the~~  
446 | ~~performance with~~ compared to AATSR. However, the comparison of MODIS and ASCIA results indicates that  
447 | ASCIA detected more cloudy scenes than the MODIS algorithm.

## 448 | [5.2 The comparison to ground-based measurements: SYNOP and AERONET](#)



## 6—Validation

In this section, we present a quantitative validation of our ASCIA results by making comparisons with simultaneous ground-based SYNOP and AERONET measurements. The ESA standard cloud product is also compared with these validation data sets. The difference in spatial and temporal resolution of the new cloud identification datasets and the data sets used to validate this dataset has to be taken into account. To define the optimal maximum temporal difference between SYNOP and satellite data, other comparable validation activities used different temporal intervals like 10 min (Werkmeister et al., 2015), 15 min (Musial et al., 2014), 1 h (Dybbroe et al., 2005) and 4 h (Meerkötter et al., 2004). The investigation and results in the previous publications indicate that temporal difference in validation of satellite retrievals against SYNOP may vary based on meteorological conditions. Allowing only a small temporal difference between measurement datasets (here: SYNOP and ASCIA) ensures as close as possible temporal resemblance but can introduce a significant sampling error due to limited number of validation cases (Bojanowski et al., 2014). According to Bojanowski et al. (2014) a temporal difference of 90 min to compare with SYNOP measurements at temporal resolution of 3 h minimizes the sampling error (Bojanowski et al., 2014). However, potential longer temporal difference will introduce an error which should be considered along other sources of uncertainty (different viewing perspective, different spatial footprint and etc.). In this study, the maximum allowed temporal difference between the ASCIA retrievals and SYNOP measurements is small being below  $\pm 20$  minutes in most cases and generally does not exceed  $\pm 45$  minutes. ~~The difference in the time of satellite and SYNOP measurements is small being below  $\pm 20$  minutes in most cases and generally does not exceed  $\pm 45$  minutes.~~ To compare surface measurement from SYNOP hemispheric view with the cloud identification at a spatial resolution  $1 \times 1 \text{ km}^2$  resolution satellite measurement, we calculated cloudiness as the percentage of cloudy scenes within a window of  $20 \times 20 \text{ km}^2$  around each SYNOP station. This is a similar distance to that used in previous studies to validate satellite based cloud identification SYNOP or similar surface measurements (Kotarba, 2017; Werkmeister et al., 2015; Minnis et al., 2003). The cloud detection data product was then compared to the three months (March, May and July) of SYNOP observations. These comprise 100 measurements over Svalbard and Greenland.

In Fig. 14 we present the relation between the calculated Cloud Fractional Cover (CFC) from ASCIA and SYNOP measurements and density plot of occurrences of the CFC by ASCIA as a function of SYNOP following the idea of Werkmeister et al. (2015). We find that these two data sets have a correlation coefficient of  $R=0.92$ . In 31 % of scenarios, ASCIA estimates 1 okta more than SYNOP while in 14 % of match-ups SYNOP shows higher CFC of 1 okta. Figure 14 also reveals that most of  $\pm 1$  okta differences occur when either SYNOP or ASCIA estimates 7 or 8 oktas which could be due to definition of 8 oktas (100 % CFC) and conversion of continuous percentage to okta (Werkmeister et al., 2015). For instance, CFC of 99.9 % is considered as 7 oktas by using Table 1 while the CFC difference is only 0.1 % with 8 oktas. The underestimation of CFC by SYNOP is also confirmed in the histogram of difference between ASCIA-SYNOP in Fig. 15 which was indicated in previous studies as well (Kotarba, 2009; Werkmeister et al., 2015). We also indicate the higher accuracy of ASCIA for cloud detection compared to the ESA cloud product. The results of the validation are summarized in Table 4. The cloud cover reported from SYNOP has an overall agreement of 96 % (within  $\pm 2$  okta) and 83 % (within  $\pm 1$  okta) with cloud identification data from

486 ASCIA. As ~~we~~ discussed earlier an error of  $\pm 1$  to  $\pm 2$  okta would be expected as the accepted accuracy range  
487 from SYNOP cloud cover values due to man-made nature of its observation and viewing conditions (Boers et  
488 al., 2010; Werkmeister et al., 2015). The ESA cloud product agrees 68 % (within  $\pm 2$  okta) and 50 % (within  $\pm 1$   
489 okta) with SYNOP CFCs. The larger differences of SYNOP and ESA cloud product are also indicated in Fig. 16  
490 where the CFC values in percentage are shown for ASCIA, ESA and SYNOP for validation scenarios. The blue  
491 error bars, indicate the range of okta values for each SYNOP according to Table 1.

492 We also validated ASCIA cloud identification results with AERONET level 1.5 measurements. Because level 1.5  
493 data are cloud screened. The procedure of this validation includes 2 steps: (1) covering AERONET observed AOT  
494 to a cloud flag (AOT is provided in AERONET only in cloud-free conditions); (2) Validation of ASCIA with  
495 AERONET cloud flag. -In 86.1 % of 36 studied~~s~~ scenes over Svalbard, both ASCIA and AERONET confirm the  
496 presence of clouds.

## 497 **6.7 Conclusion**

498 A new cloud detection algorithm, called ASCIA, for use at high altitudes above bright surfaces has been developed  
499 to generate stand-alone products and for subsequent use in the retrieval of AOT over the Arctic. ASCIA uses data  
500 from the European instruments using AATSR on the ESA Envisat (2002 to 2012) and SLSTR on the ESA Sentinel  
501 3A or 3B. ~~The~~ ASCIA employs initially a time series analysis of PCC to identify cloud presence, the stability and  
502 cloud-free conditions at the block scale of scenes ( $25 \times 25$  km<sup>2</sup>). It then uses the 3.7  $\mu$ m solar reflectance to  
503 discriminate cloud presence at the spatial resolution of the scene level, which is  $1 \times 1$  km<sup>2</sup> or  $0.5 \times 0.5$  km<sup>2</sup> for AATSR  
504 and SLSTR measurements respectively. The PCC parameter analysis is independent to a first approximation of  
505 threshold settings, which lead to misclassification of cloud and snow due to the similarity of their spectral  
506 characteristics. The brightness temperature measurements from 3.7  $\mu$ m channel provide information to convert a  
507 block level ( $25 \times 25$  km<sup>2</sup>) to a scene level ( $1 \times 1$  km<sup>2</sup> or  $0.5 \times 0.5$  km<sup>2</sup>) cloud identification. ASCIA thereby exploits the  
508 contrast in reflectance between snow/ice and cloud at 3.7  $\mu$ m wavelength.

509 The results of applying the new developed ASCIA are compared and validated against 5 existing products and  
510 methods over the Arctic: 1) SYNOP measurements, 2) AERONET measurements, 3) one of existing methods based  
511 on spectral shape of clear snow 4) AATSR L2 nadir cloud flag, 5) MODIS cloud product. The validation is resulted  
512 in overall agreement of 96 % (within  $\pm 2$  oktas) and 83 % (within  $\pm 1$  okta) between SYNOP and ASCIA. The  
513 comparison of the ASCIA and ISTO methods shows a better performance of ASCIA in extreme situations, such as  
514 high solar zenith angle conditions.

515 The validation results indicate that the current ESA AATSR L2 nadir cloud flag often falsely identify clouds over  
516 snow/ice with the exception of during summer. The comparison between the ESA AATSR L2 cloud product and  
517 SYNOP measurements resulted in 68 % (within  $\pm 2$  oktas) and 50 % (within  $\pm 1$  okta). The overall better  
518 performance of ASCIA has also been shown by the SLSTR data. However, more investigation and optimization are  
519 needed for the detection of cloud over land (soil, vegetation etc.) in the PCC blocks with lower values. Since, ~~the~~  
520 strict performance of ~~the~~ ASCIA in cloudy blocks results in scenes of clear land (without snow cover) being  
521 identified as cloud due to high reflectance of land scenes at 3.7  $\mu$ m channel. Additionally, sub-scene cloud detection



522 has not been studied with the current version of ASCIA. The use of reflectance in the 1.37  $\mu\text{m}$  channel will be tested  
523 in the future to improve thin cirrus detection in ASCIA. [Regarding the aim of this work, night time cloud](#)  
524 [identification is not considered in the current version of ASCIA. For further applications, new criteria will be added](#)  
525 [to identify clouds during night time.](#)

526 *Acknowledgements: We gratefully acknowledge the support by the Collaborative Research Centres,*  
527 *CRC/Transregio 172 “Arctic Amplification: Climate Relevant Atmospheric and Surface Processes, and Feedback*  
528 *Mechanisms (AC)<sup>3</sup>. This work has been funded in part by the DFG CRC 172 and the State and University of*  
529 *Bremen.*

### 530 **References**

- 531 Allen, R. C., Durkee, P. A., and Wash, C. H.: Snow/cloud discrimination with multispectral satellite measurements,  
532 J. Appl. Meteor., 29, 994–1004, 1990.
- 533 Arking, A. and Childs, J. D.: Retrieval of cloud cover parameters from multispectral satellites images, J. Climate  
534 Appl. Meteor., 24, 322-333, 1985.
- 535 Arola, A., Eck, T. F., Kokkola, H., Pitkanen, M. R. A., Romakkaniemi, S.: Assessment of cloud-related fine-mode  
536 AOD enhancement based on AERONET SDA product, Atmos. Chem. Phys., 17, 5991–6001, 2017.
- 537 Benesty, J., Chen, J., Huang, Y., Cohen, I.: Noise Reduction in Speech Processing, Springer Topics in Signal  
538 Processing 2, Springer-Verlag Berlin Heidelberg, doi: 10.1007/978-3-642-00296-0\_5, 2009.
- 539 Birks, A. R.: Improvements to the AATSR IPF relating to Land Surface Temperature Retrieval and Cloud Clearing  
540 over Land, AATSR Technical Note, Rutherford Appleton Laboratory, Chilton, UK, 2007.
- 541 Boers R., de Haij, M.J., Wauben, W. M. F., Baltink, H. K., van Uft, L. H., Savenije, M., Long, C. N.: Optimized  
542 fractional cloudiness determination from five ground-based remote sensing techniques, J. Geophys. Res., 115,  
543 D24116, 2010.
- 544 [Bojanowski, J., Stöckli, R., Tetzlaff, A., and Kunz, H.: The Impact of Time Difference between Satellite Overpass](#)  
545 [and Ground Observation on Cloud Cover Performance Statistics, Remote Sensing, 6, 12 866–12 884,](#)  
546 <https://doi.org/10.3390/rs61212866>, 2014.
- 547 [Bulgin, C. E., Eastwood, S., Embury, O., Merchant, C. J. and Donlon, C., Sea surface temperature climate change](#)  
548 [initiative: alternative image classification algorithms for sea-ice affected oceans. Remote Sens. Environ, 162, pp.](#)  
549 [396-407, 2015.](#)
- 550 Christensen, M. W., Neubauer, D., Poulsen, C. A., Thomas, G. E., McGarragh, G. R., Povey, A. C., Proud, S. R.,  
551 Grainger, R. G.: Unveiling aerosol–cloud interactions – Part 1: Cloud contamination in satellite products  
552 enhances the aerosol indirect forcing estimate, Atmos. Chem. Phys., 17, 13151–13164, 2017.
- 553 Cohen, J., Screen, J. A., Furtado, J., C., et al.: Recent Arctic amplification and extreme mid-latitude weather, Nat.  
554 Geosci., 7(9), 627–637, 2014.
- 555 Coppo, P., Ricciarelli, B., Brandani, F., Delderfield, J., Ferlet, M., Mutlow, C., Munro, G., Nightingale, T., Smith,  
556 D., Bianchi, S., Nicol, P., Kirschstein, S., Hennig, T., Engel, W., Frerick, J., Nieke, J., SLSTR: a high accuracy

557 dual scan temperature radiometer for sea and land surface monitoring from space, *J. Mod. Optic.*, 57(18), 1815-  
558 1830, 2010.

559 Curry, J. A., Rossow, W. B., Randall, D., Schramm, J. L.: Overview of Arctic cloud and radiation characteristics. *J.*  
560 *Climate*, 9, 1731–1764, 1996.

561 [Dybbroe, A.; Karlsson, K.-G.; Thoss, A. NWCSAF AVHRR cloud detection and analysis using dynamic thresholds](#)  
562 [and radiative transfer modeling. Part II: Tuning and validation. \*J. Appl. Meteorol.\*, 44, 55–71, 2005.](#)

563 Derrien, M., Farki, B., Harang, L., Pochic, D., Sairouni, A., LeGldau, H., Noyalet, A.: Automatic Cloud Detection  
564 Applied to NOAA-11/AVHRR Imagery, *Remote Sens. Environ.*, 46, 246-267, 1993.

565 Eck, T. F., B. N. Holben, J. S. Reid, O. Dubovik, A. Smirnov, N. T. O'Neill, I. Slutsker, and S. Kinne, Wavelength  
566 dependence of the optical depth of biomass burning, urban, and desert dust aerosols, *J. Geophys. Res.*, 104(1),  
567 333-349, 1999.

568 Ghent, D. J., Corlett, G. K., Göttsche, F.-M., & Remedios, J. J.: Global land surface temperature from the Along-  
569 Track Scanning Radiometers, *J. Geophys. Res.*, 122, 12167–12193, 2017.

570 Gómez-Chova, L., Amorós-López, J., Mateo-García, G., Muñoz-Marí, J., Camps-Valls, G.: Cloud masking and  
571 removal in remote sensing image time series, *J. Appl. Remote Sens.*, 11(1), 015005, 2017.

572 Hagolle, O., Sylvander, S., Huc, M., Claverie, M., Clesse, D., Dechoz, C., Lonjou, V., Poulain, V.: SPOT4 (Take5):  
573 A simulation of Sentinel-2 time series on 45 large sites. *Remote Sens.*, 7, 12242–12264, 2015.

574 Hall, D. K., Riggs, G., Salomonson, V. V.: Algorithm Theoretical Basis Document (ATBD) for the MODIS snow  
575 and sea-ice mapping algorithms, September 2001.

576 Holben, B. N., Eck, T. F., Slutsker, I., Tanre, D., Buis, J. P., Setzer, A., Vermote, E., Reagan, J. A., Kaufman, Y. J.,  
577 Nakajima, T., Lavenu, F., Jankowiak, I., Smirnov, A.: AERONET - a federated instrument network and data  
578 archive for aerosol characterization *Remote Sens. Environ.*, 66, 1-16, 1998.

579 [Hollmann, R.; Merchant, C.J.; Saunders, R.; Downy, C.; Buchwitz, M.; Cazenave, A.; Chuvieco, E.; Defourny, P.;](#)  
580 [de Leeuw, G.; Forsberg, R.; et al. The ESA climate change initiative Satellite Data Records for Essential Climate](#)  
581 [Variables. \*Bull. Am. Meteorol. Soc.\*, 94, 1541–1552, 2013.](#)

582 Istomina, L., Hoyningen-Huene, W., Kokhanovsky, A.A., Burrows, J.P.: The detection of cloud-free snow-covered  
583 areas using AATSR measurements, *Atmos. Chem. Phys.*, 9, 1279-1288, 2010.

584 Istomina, L.: Retrieval of aerosol optical thickness over snow and ice surfaces in the Arctic using Advanced Along  
585 Track Scanning Radiometer, Ph.D. thesis, University of Bremen, Germany, 2012.

586 Kellogg, W. W.: Climatic feedback mechanisms involving the polar regions, *Climate of the Arctic*, Weller, G., and  
587 Bowling, S. A., (Eds.), Geophysical Institute, University of Alaska, Fairbanks, AK, 111–116, 1975.

588 Key, J. and Barry, R. G.: Cloud cover analysis with Arctic AVHRR data. 1. Cloud detection, *J. Geophys. Res.*, 94,  
589 D15, 18521– 18535, 1989.

590 Kim B-M, Hong J-Y, Jun S-Y, Zhang X, Kwon H, Kim S-J, Kim J-H, Kim S-W and Kim H-K: Major cause of  
591 unprecedented Arctic warming in January 2016: critical role of an Atlantic windstorm *Sci. Rep.*, 7, 40051,  
592 doi:10.1038/srep40051, 2017.

593 Khlopenkov, K., Trishchenko, A. SPARC: New cloud, snow, and cloud shadow detection scheme for historical 1-  
594 km AVHRR data over Canada, *J. Atmos. Ocean. Technol.*, 24, 322–343, 2007.

595 Klüser, L., Killius, N., Gesell, G.: APOLLO\_NG – a probabilistic interpretation of the APOLLO legacy for AVHRR  
596 heritage channels, *Atmos. Meas. Tech.*, 8, 4155–4170, 2015.

597 Kokhanovsky, A. A.: *Cloud Optics*, Eds.: Mysak, L. A., Hamilton, K., Publ. Springer, 2006.

598 Kolmonen, P., Sundström, A. -M., Sogacheva, L., Rodriguez, E., Virtanen, T. H., & de Leeuw, G.: Uncertainty  
599 characterization of AOD for the AATSR dual and single view retrieval algorithms, *Atmos. Meas. Tech. Discuss.*,  
600 6, 4039–4075, 2013.

601 Kolmonen, P., Sogacheva, L., Virtanen, T. H., de Leeuw, G., Kulmala, M.: The ADV/ASV AATSR aerosol retrieval  
602 algorithm: current status and presentation of a full-mission AOD dataset, *Int. J. Digit. Earth*, 9, 545-561, 2016.

603 Kotarba, A. Z.: A comparison of MODIS-derived cloud amount with visual surface observations, *J. Atmos. Res.*, 92,  
604 522–530, doi:10.1016/j.atmosres.2009.02.001, 2009.

605 Kotarba A. Z.: Inconsistency of surface-based (SYNOP) and satellite-based (MODIS) cloud amount estimations due  
606 to the interpretation of cloud detection results. *Int. J. Climatol.* 37(11):4092–4104, 2017.

607 Law, K. S., Stohl, A.: Arctic Air pollution: origins and impacts, *J. Science*, 315 (5818), 1537-1540, doi:  
608 10.1126/science.1137695, 2007.

609 Leese, J. A., Novak, C. S., Taylor, V. R.: The determination of cloud pattern motions from Geosynchronous Satellite  
610 Image Data, *J. Pattern Recognition*, 2, 279-292, 1970.

611 Lyapustin, A., Wang, Y., and Frey, R.: An automated cloud mask algorithm based on time series of MODIS  
612 measurements, *J. Geophys. Res.*, 113, D16207, doi:10.1029/2007JD009641, 2008.

613 Lyapustin, A., Tedesco, M., Wang, Y., Aoki, T., Hori, M., Kokhanovsky, A.: Retrieval of snow grain size over  
614 Greenland from MODIS Remote Sens. Environ., 113 (9), 1976-198, 2009.

615 Martins, J.V., Tanre, D., Remer, L., Kaufman, Y.J., Mattoo, S., Levy, R.: MODIS Cloud screening for remote  
616 sensing of aerosols over oceans using spatial variability. *Geophys. Res. Lett.* 29 (12), 1619, 2002.

617 Mei, L., Xue, Y., Kokhanovsky, A. A., von Hoyningen-Huene, W., Istomina, L., de Leeuw, G., Burrows, J. P.,  
618 Guang, J., Jing, Y., Aerosol optical depth retrieval over snow using AATSR data, *International Journal of*  
619 *Remote Sensing*, 34, 5030-5041, 2013.

620 Mei, L., Rozanov, V. V., Vountas, M., Burrows, J. P., Levy, R. C., and Lotz, W. A.: Retrieval of aerosol optical  
621 properties using MERIS observations: algorithm and some first results, *Remote Sens. Environ.*, 197, 125–141,  
622 2017a.

623 Mei, L. L., Vountas, M., Gómez-Chova, L., Rozanov, V., Jäger, M., Lotz, W., Burrows, J. P., and Hollmann, R.: A  
624 Cloud masking algorithm for the XBAER aerosol retrieval using MERIS data, *Remote Sens. Environ.*, 197, 141–  
625 160, 2017b.

626 [Meerkötter, R., König, C., Bissolli, P., Gesell, G., Mannstein, H., A 14-year European cloud climatology from](#)  
627 [NOAA/AVHRR data in comparison to surface observations. \*Geophys. Res. Lett.\*, 31,](#)  
628 [doi:10.1029/2004GL020098, 2004.](#)

629 ~~Meyer, K., Platnick, S.: Utilizing the MODIS 1.38  $\mu\text{m}$  channel for cirrus cloud optical thickness retrievals:~~  
630 ~~Algorithm and retrieval uncertainties, *J. Geophys. Res.*, 115, D24209, 2010.~~

631 Minnis, P., Spangenberg, D.A., Chakrapani, V.: Distribution and validation of cloud cover derived from AVHRR  
632 data over the Arctic Ocean during the SHEBA year. Proc. 13th ARM Science Team Meeting, Broomfield,  
633 Colorado, March 31–April 4, 2003.

634 Musial, J. P., Husler, F., Sutterlin, M., Neuhaus, C., Wunderle, S.: Daytime low Stratiform cloud detection on  
635 AVHRR Imagery, *Remote Sens.*, 6, 5124-5150, doi: 10.3390/rs6065124, 2014.

636 North, P. R. J., Briggs, S. A., Plummer, S. E., & Settle, J. J.: Retrieval of land surface bidirectional reflectance and  
637 aerosol opacity from ATSR-2 multi-angle imagery, *IEEE Trans. Geosci. Remote Sens.* 37, 526–537, 1999.

638 Pavolonis, M. J., Heidinger, A. K., and Uttal, T.: Daytime global cloud typing from AVHRR and VIIRS: Algorithm  
639 description, validation, and comparison, *J. Appl. Meteorol.*, 44, 804-826, 2005.

640 Pearson, K., VII. Mathematical contributions to the theory of evolution.—III. Regression, heredity, and panmixia,  
641 *Philos. T. Roy. Soc. A.*, 187, 253-318, 1896.

642 Pithan, F., Mauritsen, T.: Arctic amplification dominated by temperature feedbacks in contemporary climate models,  
643 *Nat. Geosci.*, 7, 181–184, 2014.

644 Platnick, S., Fontenla, J. M.: Model calculations of solar spectral irradiance in the 3.7 band for Earth remote sensing  
645 application, *Am. Meteorol. Soc.*, 47, 124-134, 2008.

646 Remer, L. A., Mattoo, S., Levy, R. C., Heidinger, A., Pierce, R. B., Chin, M.: Retrieving aerosol in a cloudy  
647 environment: aerosol product availability as a function of spatial resolution, *Atmos. Meas. Tech.*, 5, 1823–1840,  
648 2012.

649 Rodgers, J. L., Nicewander, W. A.: Thirteen Ways to Look at the Correlation Coefficient, *The American*  
650 *Statistician*, 42 (1), 59-66, 1988.

651 Rosenfeld, D., Cattani, E., Melani, S., Levizzani, V.: Considerations on daylight operation of 1.6 versus 3.7 mm  
652 channel on NOAA and METOP satellites, *American Meteorologica Society*, 85, 873-881, 2004.

653 Rossow, W.B., and Garder, L. C.: Validation of ISCCP cloud detections. *J. Climate*, 6, 2370-2393, 1993.

654 Serreze M. C., Barry R. G.: Processes and impacts of Arctic amplification: a research synthesis, *Global and*  
655 *Planetary Change*, 77, 85–96, 2011.

656 Meirink, J., F., van Zadelhoff, G. J., Algorithm Theoretical Basis Document SEVIRI Cloud Physical Products,  
657 CLAAS Edition 2, Date: 10.06.2016, Issue: 2.2. 2016.

658 Shi, Y., Zhang, J., Reid, J. S., Liu, B., and Hyer, E. J.: Critical evaluation of cloud contamination in the MISR  
659 aerosol products using MODIS cloud mask products, *Atmos. Meas. Tech.*, 7, 1791– 1801, doi:10.5194/amt-7-  
660 1791-2014, 2014.

661 Sobrino, J. A., Jiménez-Muñoz, J. C., Sòria, G., Ruescas, A. B., Danne, O., Brockmann, C., Ghent, D., Remedios, J.,  
662 North, P., Merchant, C., Berger, M., Mathieu, P. P., Göttsche, F. M.: Synergistic use of MERIS and AATSR as a  
663 proxy for estimating Land Surface Temperature from Sentinel-3 data, *Remote Sens. Environ.*, 179, 149–161,  
664 2016.

665 Sobrino, J. A., Jiménez-Muñoz, J. C., Barres, G. S., Julien, Y.: Synergistic Use of The Sentinel Missions For  
666 Estimating And Monitoring Land Surface Temperature (SEN4LST FINAL REPORT), ESA technical report, doi:  
667 10.13140/RG.2.2.34693.35049, 2013.

668 Soliman, A., Duguay, C., Saunders, W., Hachem, S.: Pan-Arctic land surface temperature from MODIS and  
669 AATSR: Product development and intercomparison, *Remote. Sens-Basel*, 4, 3833-3856, 2012.

670 Spangenberg, D. A., Chakrapani, V., Doelling, D. R., Minnis, P., and Arduini, R. F.: Development of an automated  
671 Arctic cloud mask using clear-sky satellite observations taken over the SHEBA and ARM NSA sites, *Proc. 6th*  
672 *Conf. on Polar Meteor. and Oceanography*, San Diego, CA, 14–18 May 2001, 246–249, 2001.

673 Thomas, G. E., Carboni, E., Sayer, A. M., Poulsen, C. A., Siddans, R., and Grainger, R. G.: Oxford-RAL Aerosol  
674 and Cloud (ORAC): aerosol retrievals from satellite radiometers, in: *Satellite Aerosol Remote Sensing Over*  
675 *Land*, edited by: Kokhanovsky, A. A. and de Leeuw, G., Springer, Berlin, Germany, 193–225, 4042, 4051, 2009.

676 Várnai, T., Marshak, A.: Effect of Cloud Fraction on Near-Cloud Aerosol Behavior in the MODIS Atmospheric  
677 Correction Ocean Color Product, *Remote Sens.*, 7, 5283–5299, 2015.

678 ~~Veefkind, J. P., & de Leeuw, G.: A new algorithm to determine the spectral aerosol optical depth from satellite  
679 radiometer measurements., *J. Aerosol Sci.* 29, 1237–1248, 1998.~~

680 ~~Veefkind, J. P., de Leeuw, G. D., and Durkee, P. A.: Retrieval of aerosol optical depth over land using two angle  
681 view satellite radiometry during TARFOX, *Geophys. Res. Lett.*, 25, 3135–3138, 1999.~~

682 Werkmeister, A., Lockhoff, M., Schrempf, M., Tohsing, K., Liley, B., and Seckmeyer, G.: Comparing satellite- to  
683 ground-based automated and manual cloud coverage observations – a case study, *Atmos. Meas. Tech.*, 8, 2001-  
684 2015, 2015.

685 Wendisch, M., M. Brückner, J. P. Burrows, S. Crewell, K. Dethloff, K. Ebell, Ch. Lüpkes, A. Macke, J. Notholt, J.  
686 Quaas, A. Rinke, and I. Tegen,: Understanding causes and effects of rapid warming in the Arctic. *Eos*, 98, doi:  
687 10.1029/2017EO064803, 2017.

688 Wind, G., da Silva, A. M., Norris, P. M., Platnick, S., Mattoo, S., Levy, R. C.: Multi-sensor cloud and aerosol  
689 retrieval simulator and remote sensing from model parameters – Part 2: Aerosols, *Geosci. Model Dev.*, 9, 2377–  
690 2389, 2016.

691 WMO: Manual on Codes. Part A – Alphanumeric Codes. Secretariat of the World Meteorological Organization:  
692 Geneva, Switzerland, 1995.

693 Zavody, A. M., Mutlow, C. T., and Llewellyn-Jones, D. T.: Cloud Clearing over the Ocean in the Processing of Data  
694 from the Along-Track Scanning Radiometer (ATSR), *Journal of Atmospheric and Oceanic Technology*, 17, 595-  
695 615, 2000.

**Table 1.** Calculation of cloudiness in percentage for corresponding okta values

| Percentage of Cloud     | Okta |
|-------------------------|------|
| 0                       | 0    |
| $0 < \% < 18.75$        | 1    |
| $18.75 \leq \% < 31.25$ | 2    |
| $31.25 \leq \% < 43.75$ | 3    |
| $43.75 \leq \% < 56.25$ | 4    |
| $56.25 \leq \% < 68.75$ | 5    |
| $68.75 \leq \% < 81.25$ | 6    |
| $81.25 \leq \% < 100$   | 7    |
| 100                     | 8    |

**Table 2.** Simulated and observed reflectance values at 3.7  $\mu\text{m}$  (Allen et al., 1990)

| Surface/cloud Type | Simulation of 3.7 $\mu\text{m}$<br>Reflectance | Observation of 3.7 $\mu\text{m}$<br>Reflectance |
|--------------------|------------------------------------------------|-------------------------------------------------|
| Ice cloud          | 0.01-0.3                                       | 0.02-0.27                                       |
| Liquid cloud       | 0.1-0.45                                       | 0.08-0.36                                       |
| Clear land         | ~0.15                                          | 0.03-0.1                                        |
| Snow cover         | 0.005-0.025                                    | 0.02- 0.04                                      |

**Table 3.** Land classification criteria in cloud-free scene.

| Surface Type | <del>Test</del> <del>Simulation of 3.7 <math>\mu</math>m Reflectance</del> | Description                     |
|--------------|----------------------------------------------------------------------------|---------------------------------|
| Water        | $R_{0.87} < 11\% \ \& \ \text{NDSI} \geq 0.4$                              | MODIS snow and ice mapping ATBD |
| Sea-ice      | $R_{0.87} > 11\% \ \& \ \text{NDSI} \geq 0.4$                              | (Hall et al., 2001)             |
| Land         | $R_{3.7} > 0.04 \ \& \ R_{0.66} < 0.2 \ \parallel \ \text{NDSI} < 0.4$     | Allen et al., 1999              |
| Snow         | $R_{3.7} \leq 0.04$                                                        | Allen et al., 1999              |



699  
700

**Table 4.** A summary of the comparison of ASCIA and ESA cloud product with SYNOP measurements used to validate these products.

| Cloud data      | Criteria                                               |                                                        |
|-----------------|--------------------------------------------------------|--------------------------------------------------------|
|                 | within $\pm 2$ oktas                                   | within $\pm 1$ okta                                    |
| ASCIA vs. SYNOP | 96 % <del>correct</del> <a href="#">agreement</a>      | 83 % <del>correct</del> <a href="#">agreement</a>      |
|                 | 4 % <del>incorrect</del> <a href="#">disagreement</a>  | 17 % <del>incorrect</del> <a href="#">disagreement</a> |
| ESA vs. SYNOP   | 68 % <del>correct</del> <a href="#">agreement</a>      | 50 % <del>correct</del> <a href="#">agreement</a>      |
|                 | 32 % <del>incorrect</del> <a href="#">disagreement</a> | 50 % <del>incorrect</del> <a href="#">disagreement</a> |

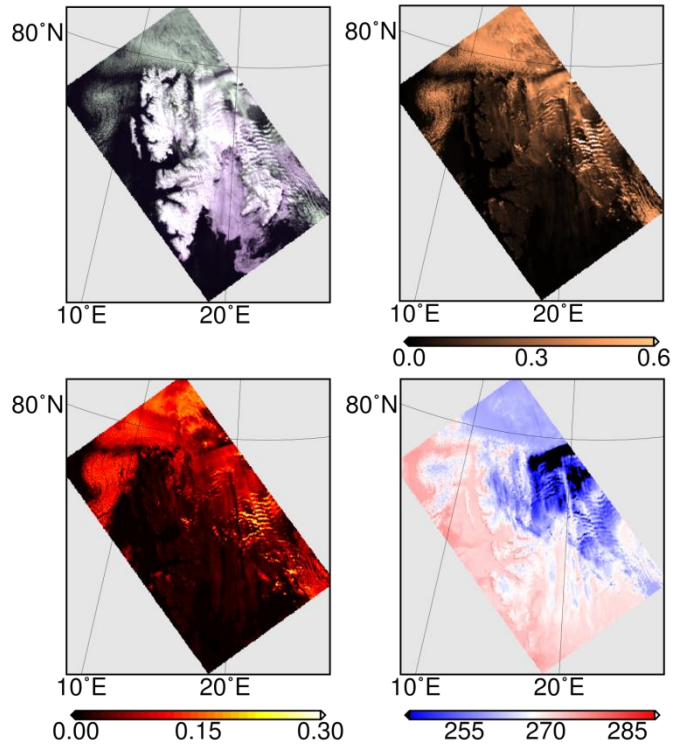

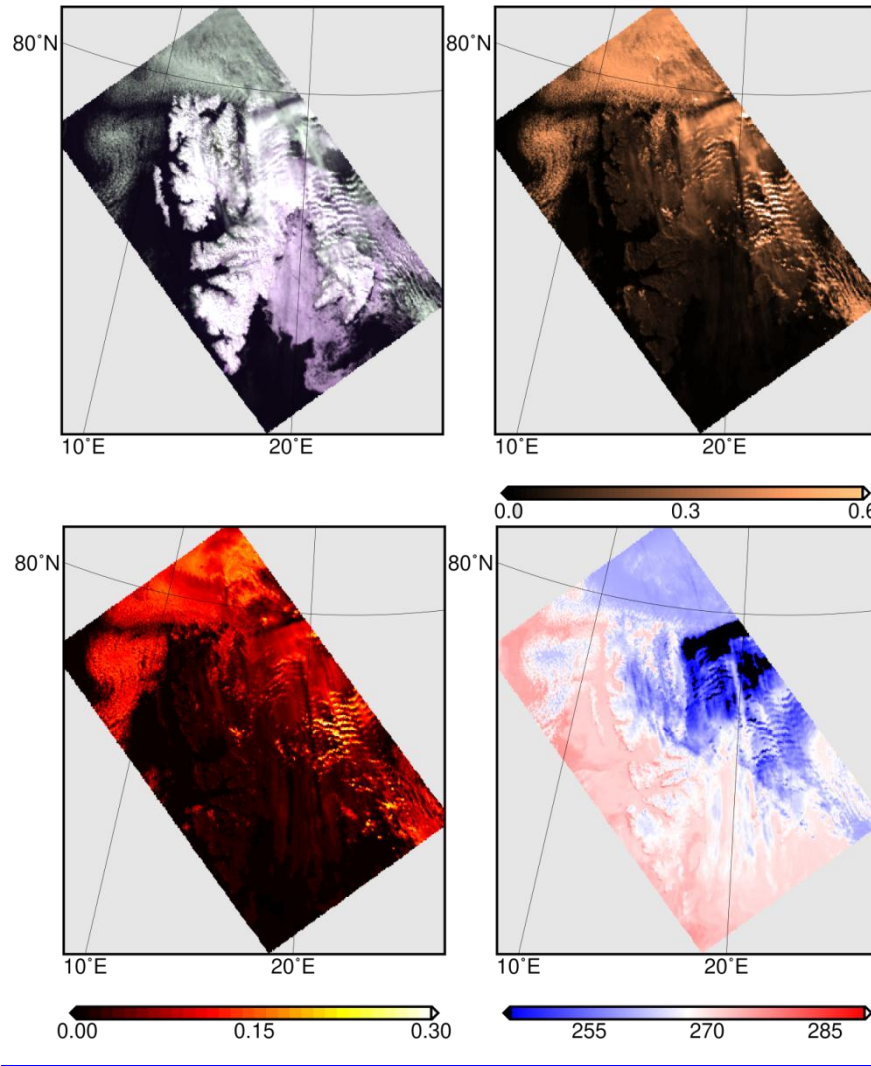

701 **Figure 1.** Upper left: the false colour RGB image of AATSR (using 0.67, 0.87 and 0.55  $\mu\text{m}$  channels) over Svalbard, 10 May  
 702 2006, upper right: 1.6  $\mu\text{m}$  reflectance, lower left: 3.7  $\mu\text{m}$  reflectance, lower right: 11  $\mu\text{m}$  brightness temperature.

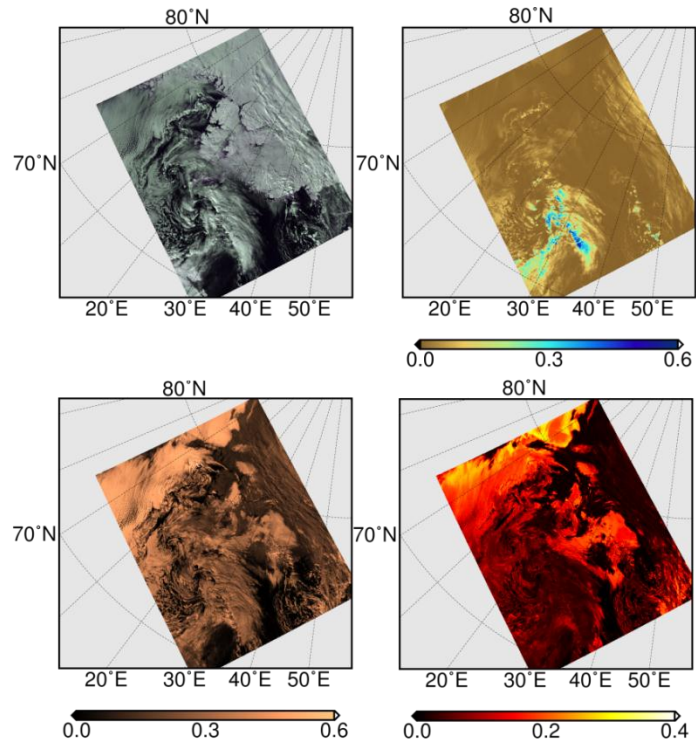

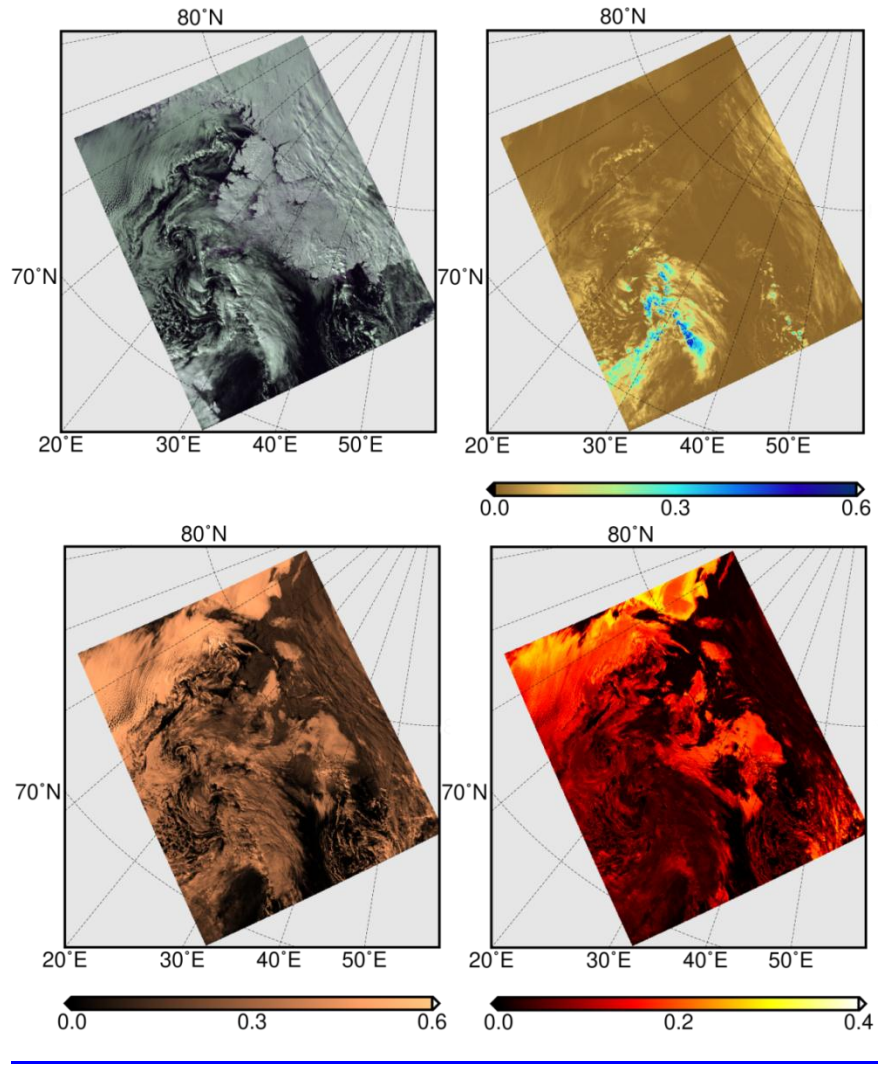

703 **Figure 2.** Upper left: the RGB [false colour](#) image ([using 0.67, 0.87 and 0.55 μm channels](#)) of SLSTR over Svalbard, 18  
 704 April 2017, upper right: 1.37 μm reflectance, lower left: 1.6 μm reflectance, lower right: 3.7 μm reflectance.

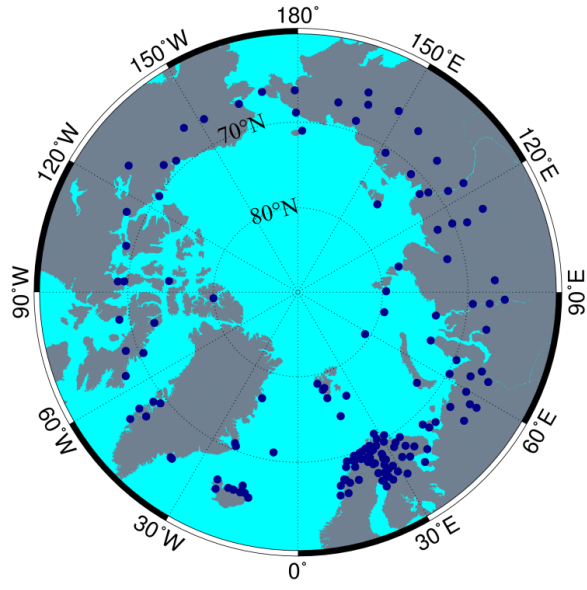

705 **Figure 3.** SYNOP network coverage over the Arctic, the dark blue points indicate the location of SYNOP stations.

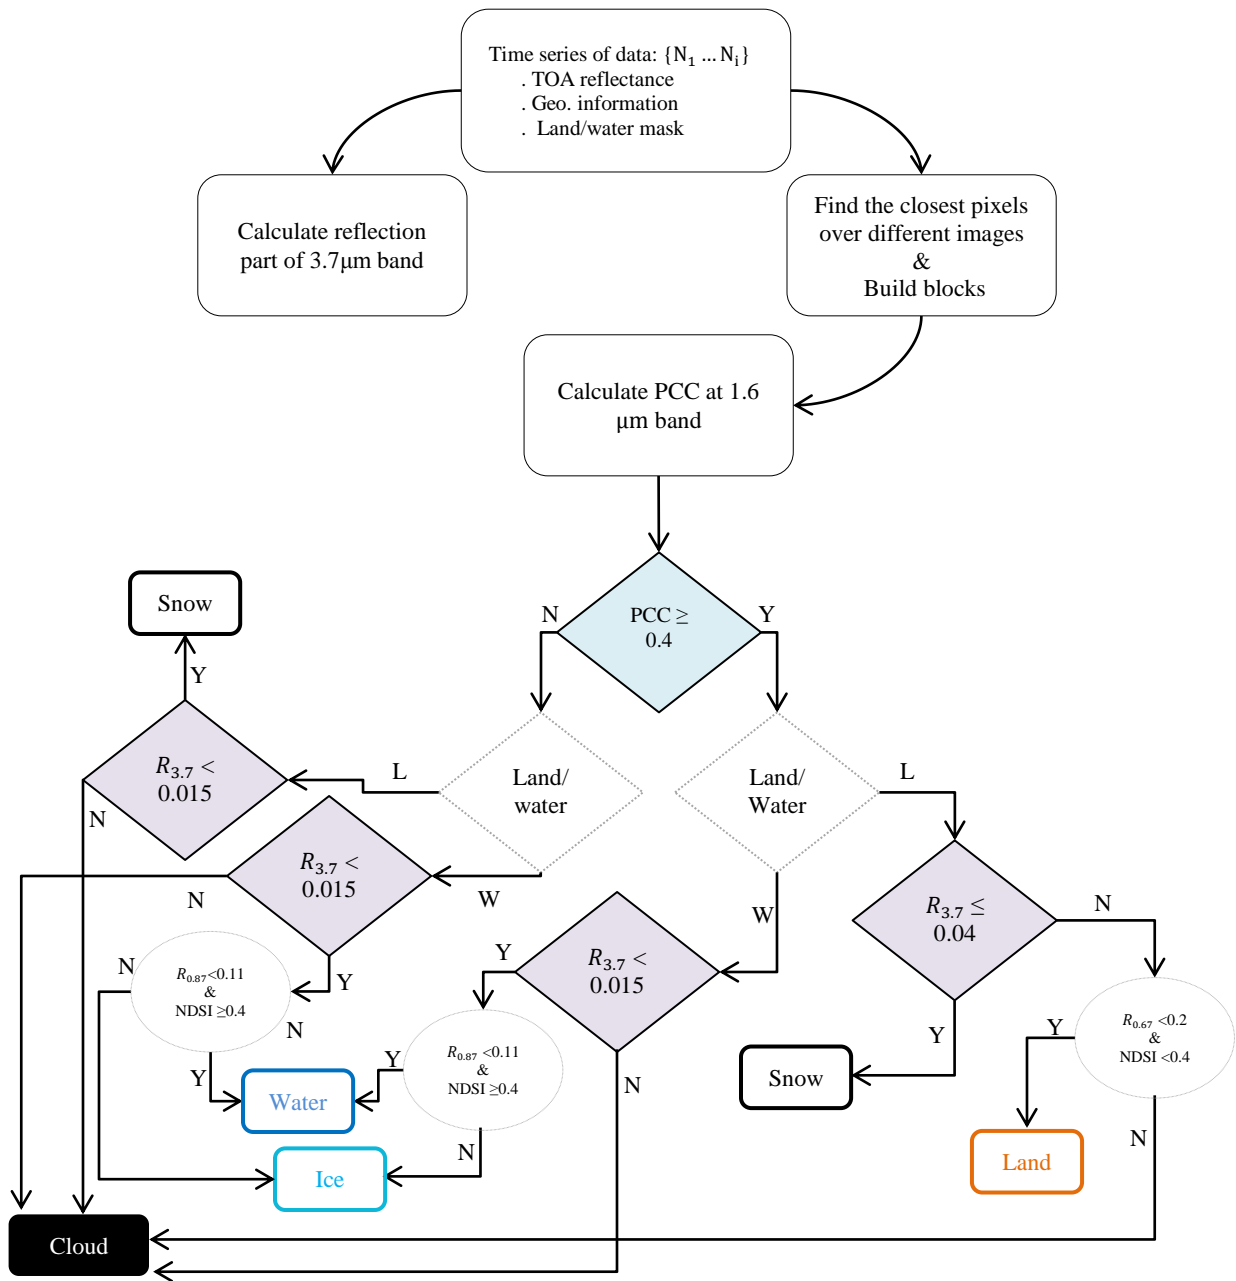

706 **Figure 4.** The schematic flowchart of ASCIA.

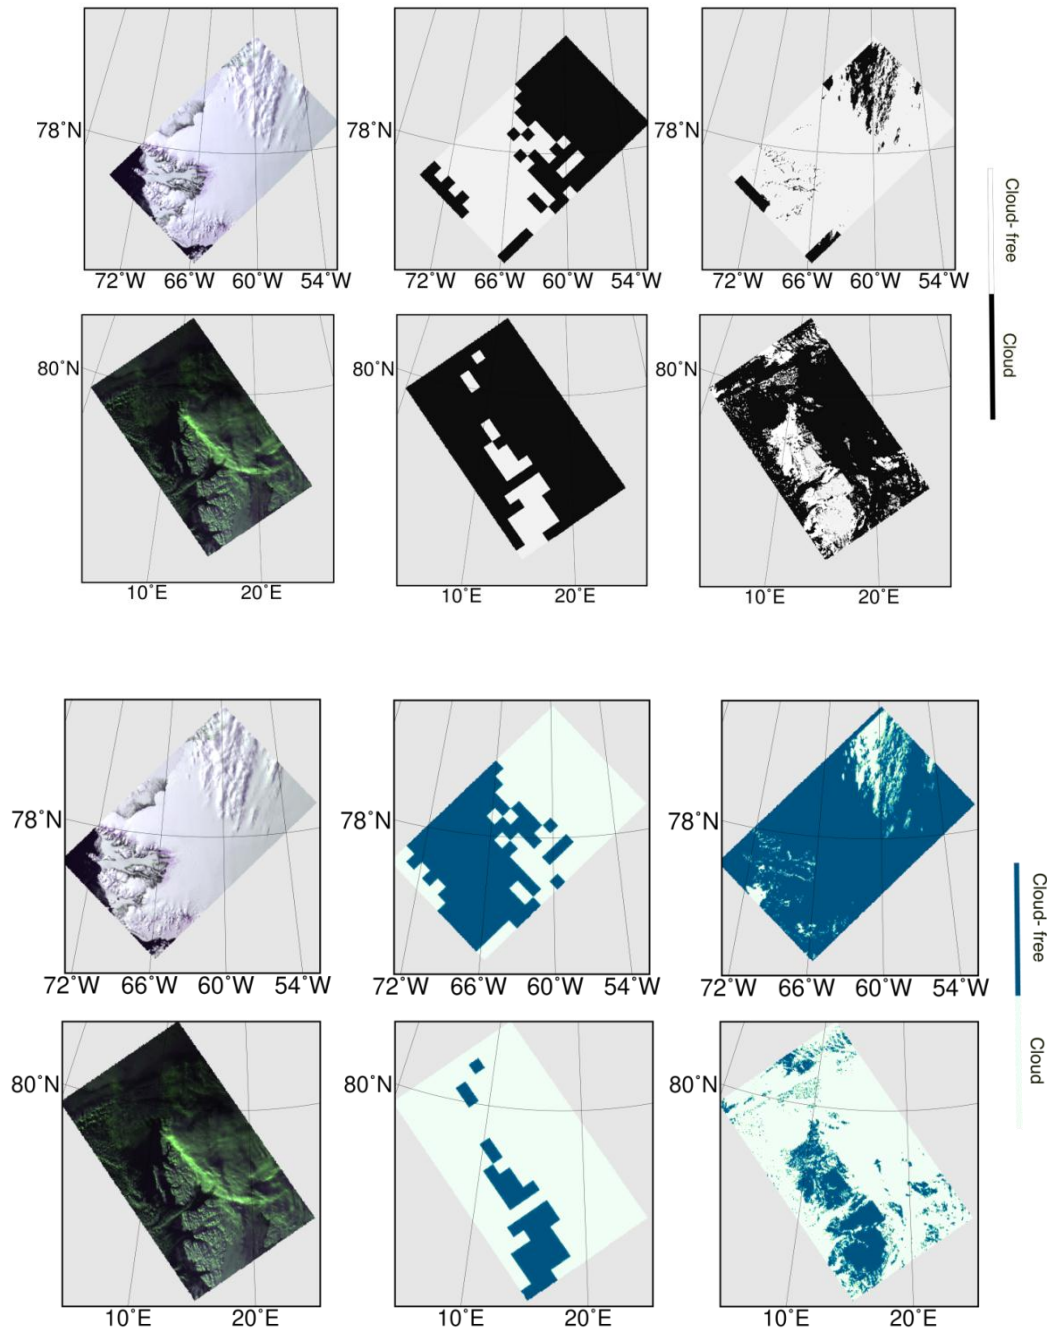

707 **Figure 5.** Examples of the results of ASCIA on AATSR observations on the scenes over Greenland (upper panels) [between](#)  
 708 [\(75°N, 48°W\), \(75°N, 75°W\), \(81°N, 48°W\), \(81°N, 75°W\)](#), taken on the 18 May 2008 and Svalbard (lower panels), within  
 709 [\(75°N, 4°E\), \(75°N, 32°E\), \(81°N, 4°E\), \(81°N, 32°E\)](#) (Lower panels), taken on the 18 May 2008 and on the 1 March 2008  
 710 respectively. Left panels: RGB false colour images (using 0.67, 0.87 and 0.55  $\mu\text{m}$  channels), middle panels: Cloud detection at  
 711 block level ( $25 \times 25 \text{ km}^2$ ), right panels: cloud detection at scene level.



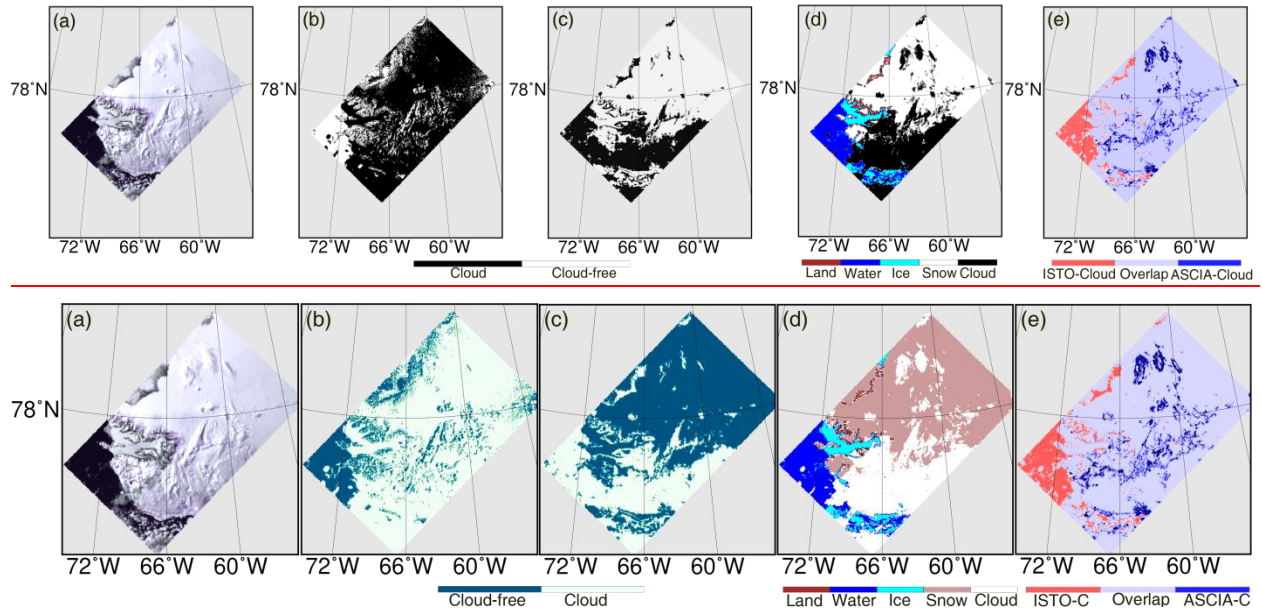

712 | **Figure 6.** (a) The RGB [false colour](#) image (using 0.67, 0.87 and 0.55  $\mu\text{m}$  channels) of AATSR over northern Greenland, 24 May  
 713 | 2008, (b) Nadir cloud flag from AATSR L2 product, (c) cloud detection based on spectral shape of clear snow, (d) cloud  
 714 | detection of ASCIA, (e) difference between ISTO and ASCIA

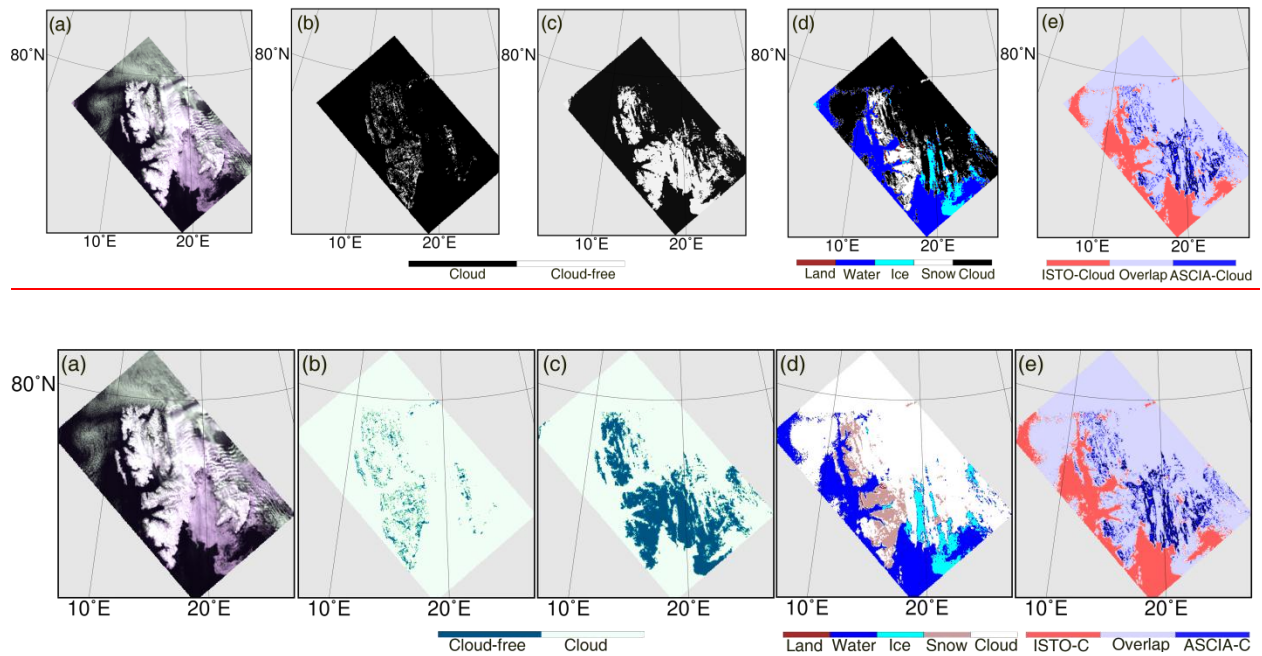

715 | **Figure 7.** (a) The RGB [false colour](#) image (using 0.67, 0.87 and 0.55  $\mu\text{m}$  channels) of AATSR over Svalbard, 10 May 2006, (b)  
 716 | Nadir cloud flag from AATSR L2 product, (c) cloud detection based on spectral shape of clear snow, (d) cloud detection of  
 717 | ASCIA, (e) difference between ISTO and ASCIA.

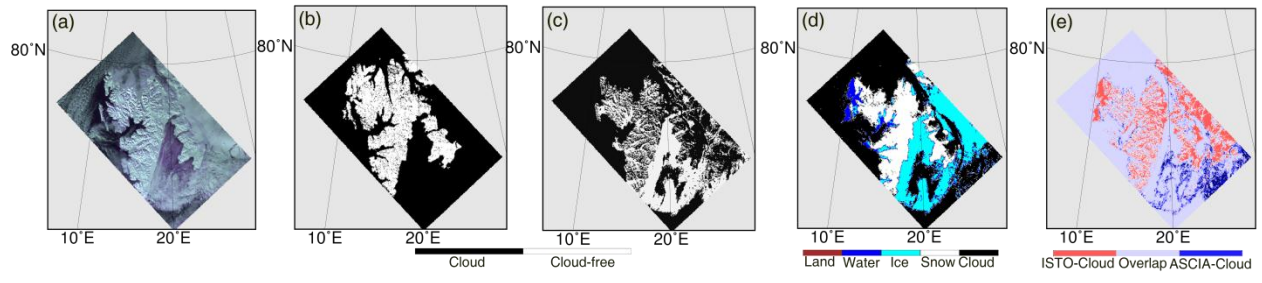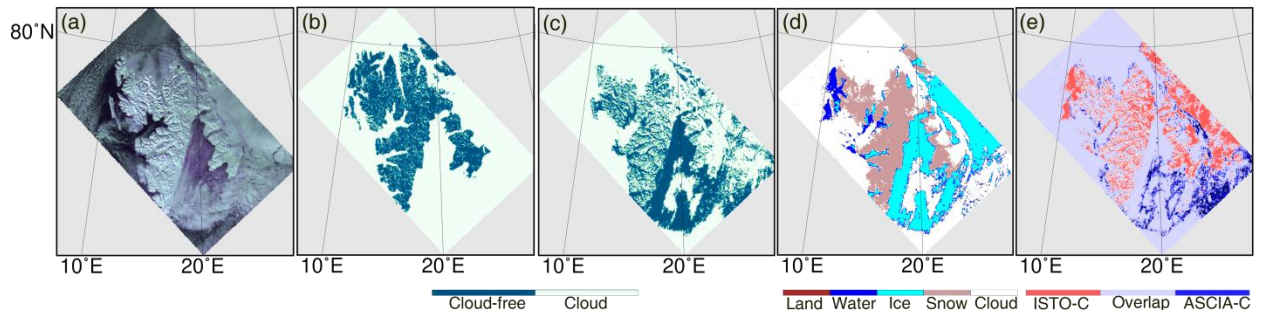

718 **Figure 8.** (a) The RGB false colour image (using 0.67, 0.87 and 0.55  $\mu\text{m}$  channels) of AATSR over Svalbard, 18 March 2008, (b) Nadir  
 719 cloud flag from AATSR L2 product, (c) cloud detection based on spectral shape of clear snow, (d) cloud detection of ASCIA, (e) difference  
 720 between ISTO and ASCIA.

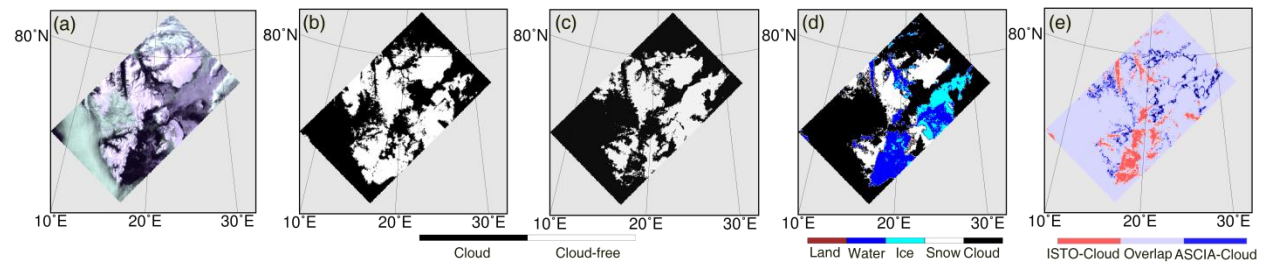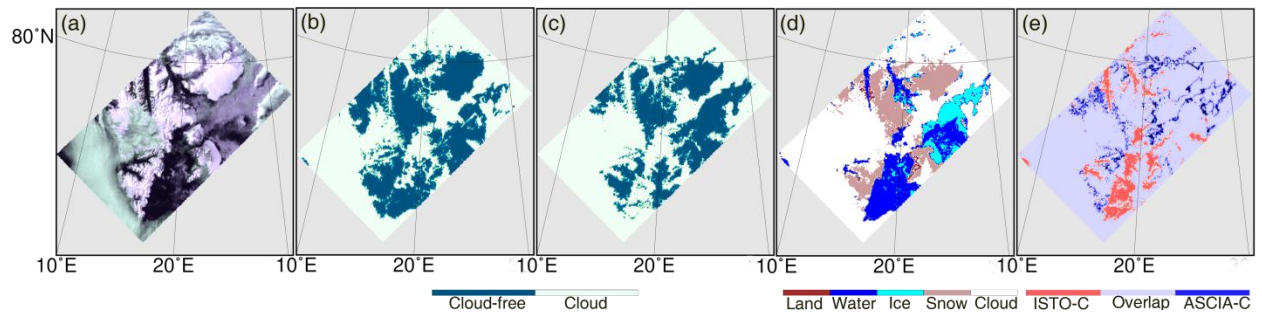

721 **Figure 9.** (a) The RGB false colour image (using 0.67, 0.87 and 0.55  $\mu\text{m}$  channels) of AATSR over Svalbard, 6 July 2008, (b) Nadir  
 722 cloud flag from AATSR L2 product, (c) cloud detection based on spectral shape of clear snow, (d) cloud detection of ASCIA, (e) difference  
 723 between ISTO and ASCIA.

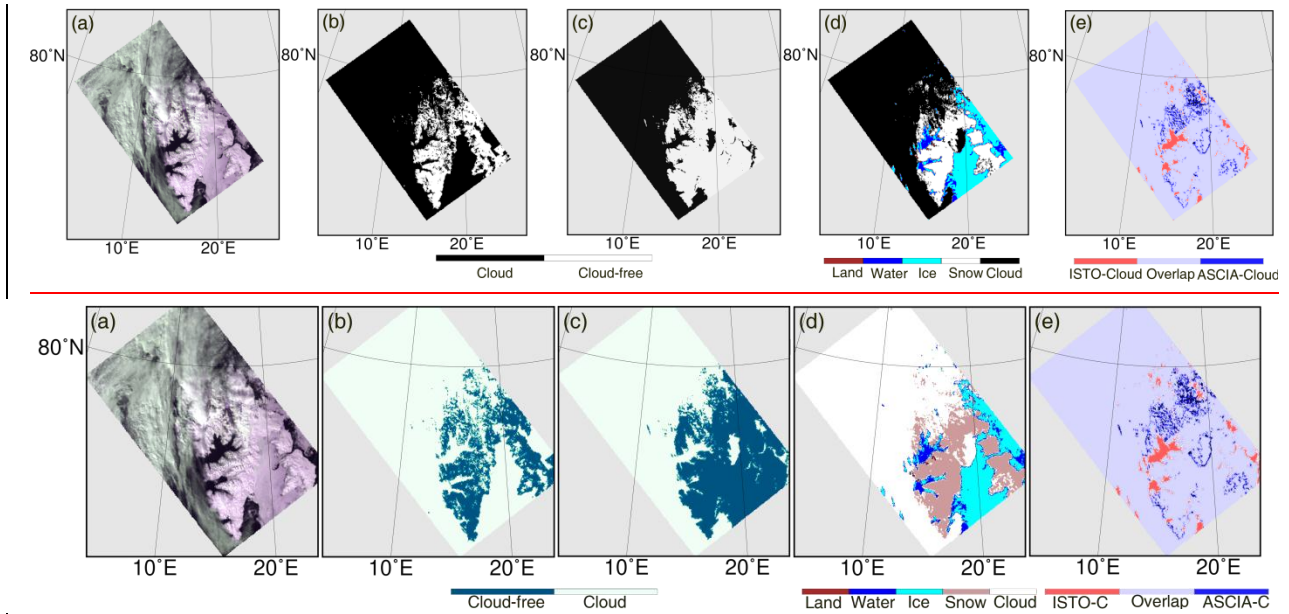

725 **Figure 10.** (a) The RGB false colour image (using 0.67, 0.87 and 0.55  $\mu\text{m}$  channels) of AATSR over Svalbard, 3 May 2006, (b) Nadir cloud  
 726 flag from AATSR L2 product, (c) cloud detection based on spectral shape of clear snow, (d) cloud detection of ASCIA, (e) difference between  
 727 ISTO and ASCIA.

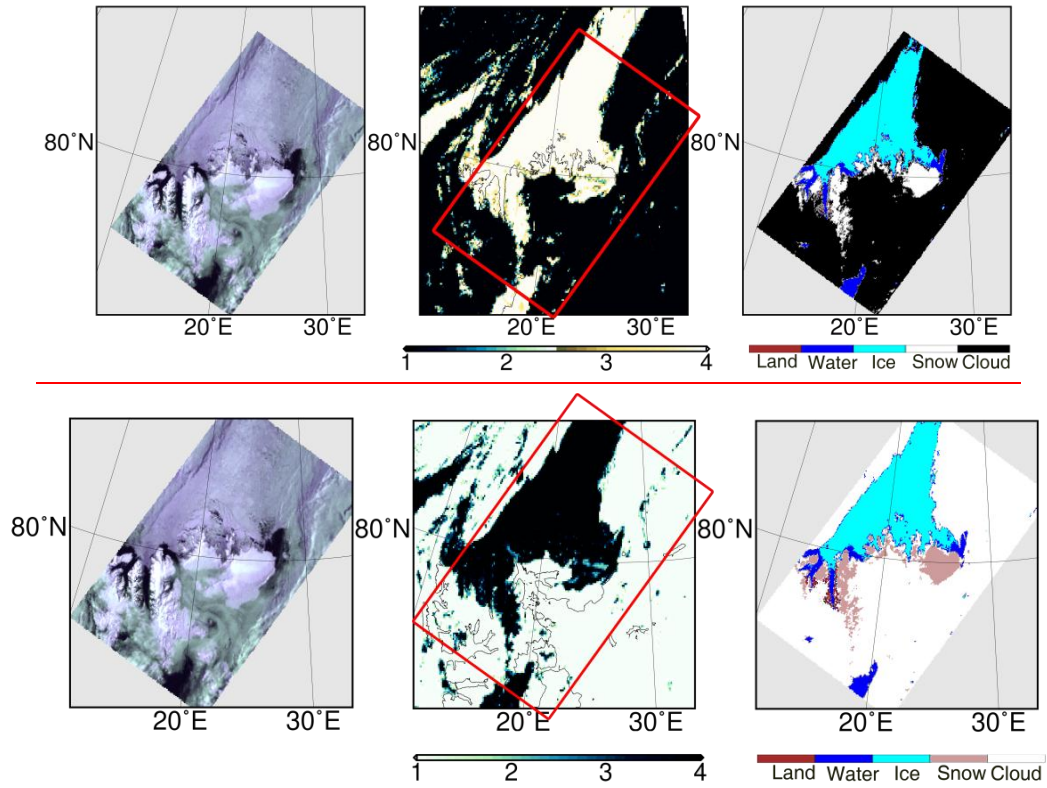

728 | **Figure 11.** Left panel: RGB [false colour](#) image [\(using 0.67, 0.87 and 0.55  \$\mu\text{m}\$  channels\)](#) of AATSR over Svalbard, 14 July  
 729 2008, 16h 40min 45s, middle panel MODIS cloud mask algorithm retrieved data: 1- cloudy, 2- probably cloudy, 3- probably  
 730 clear, 4- clear, (red rectangle shows the coverage of AATSR) for 16h 25 min, right panel: the results for the cloud detection of  
 731 ASCIA.



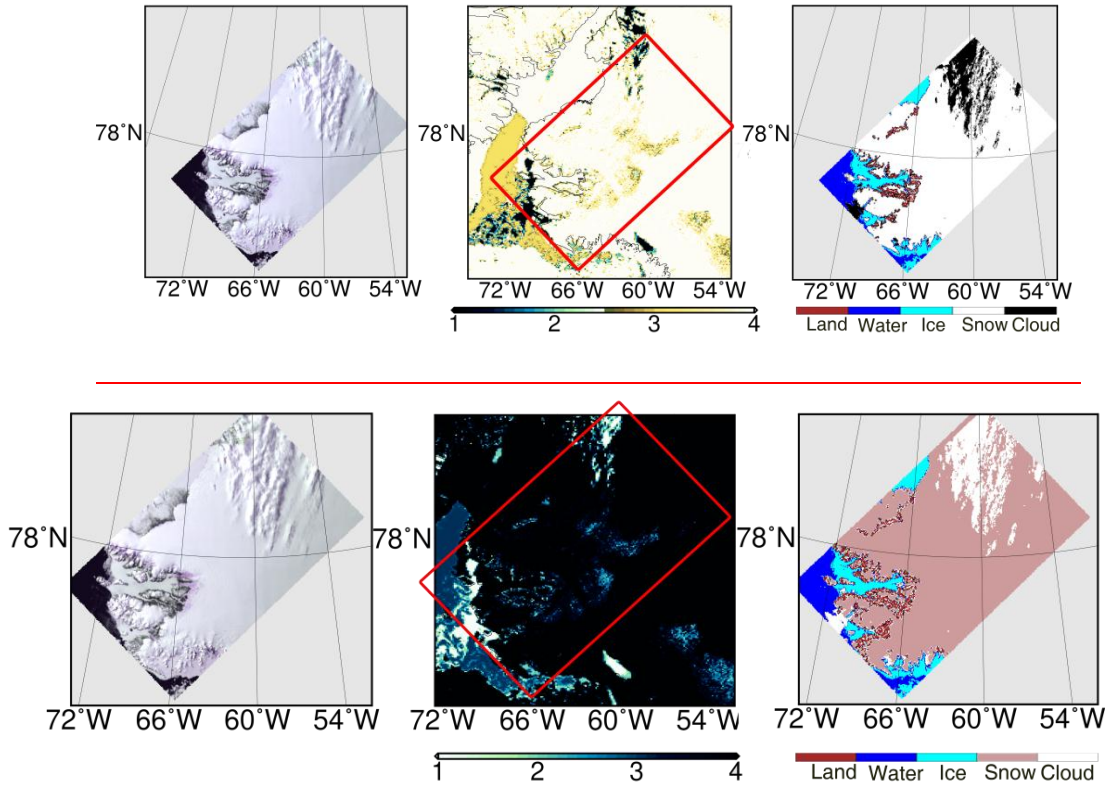

732 | **Figure 12.** Left panel: RGB [false colour](#) image [\(using 0.67, 0.87 and 0.55  \$\mu\text{m}\$  channels\)](#) -of AATSR over Greenland, 18 May  
 733 2008, 23h 13min 38s, middle panel: MODIS cloud mask: 1- cloudy, 2- probably cloudy, 3- probably clear, 4- clear, (red  
 734 rectangle shows the coverage of AATSR) for 23h 5min, right panel: Cloud detection of ASCIA.

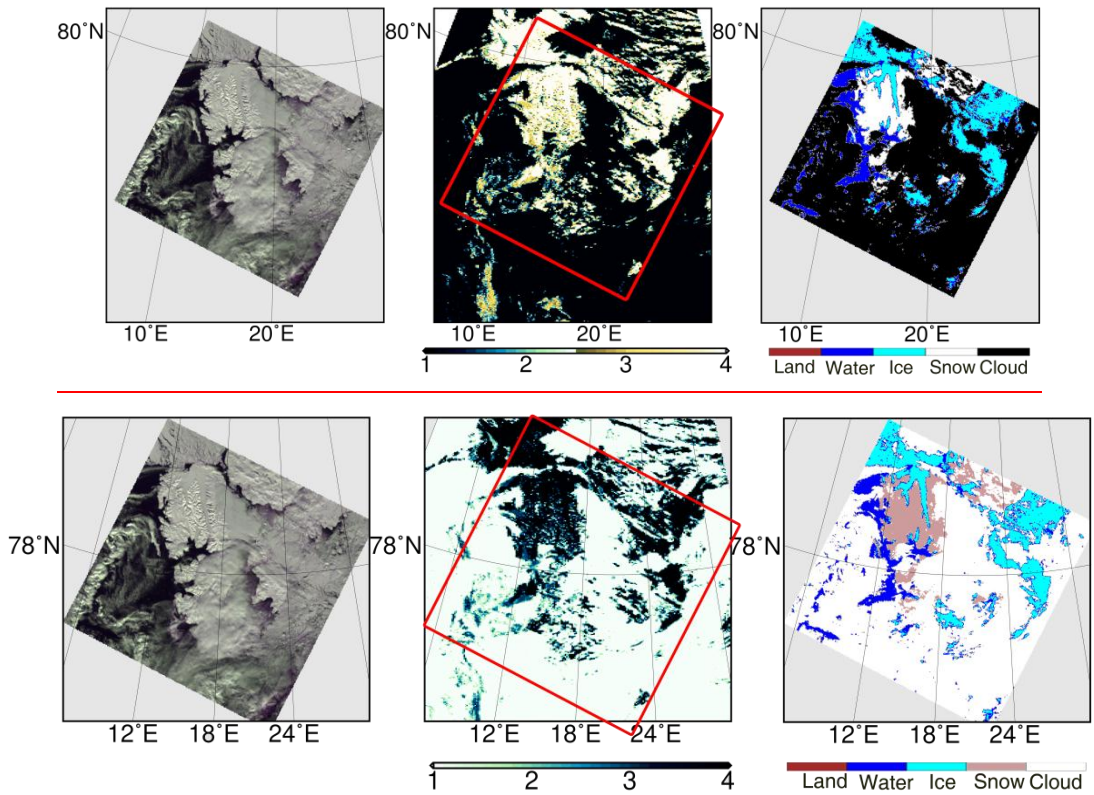

735 | **Figure 13.** Left panel: The RGB [false colour](#) image ([using 0.67, 0.87 and 0.55  \$\mu\text{m}\$  channels](#)) of SLSTR over Svalbard, 18 April  
 736 2017, 10hr 15min 6s, Middle panel: MODIS cloud mask: 1- cloudy, 2- probably cloudy, 3- probably clear, 4- clear, (red rectangle  
 737 shows the coverage of AATSR) for 11h 30m, right panel: Cloud detection of ASCIA.

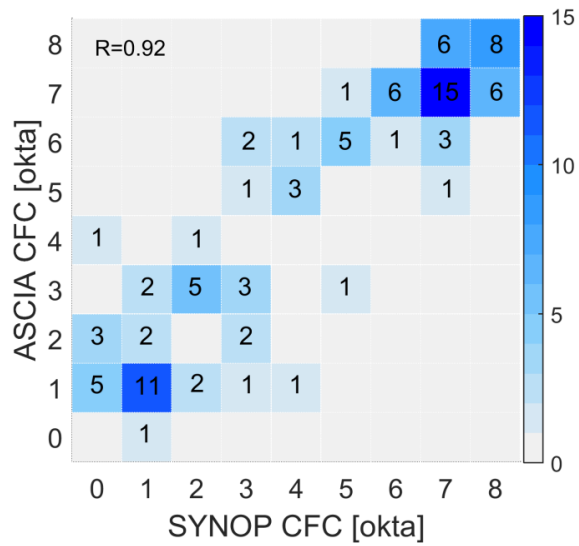

738

**Figure 14.** Density plot of occurrences of the CFC by ASCIA as a function of SYNOP.

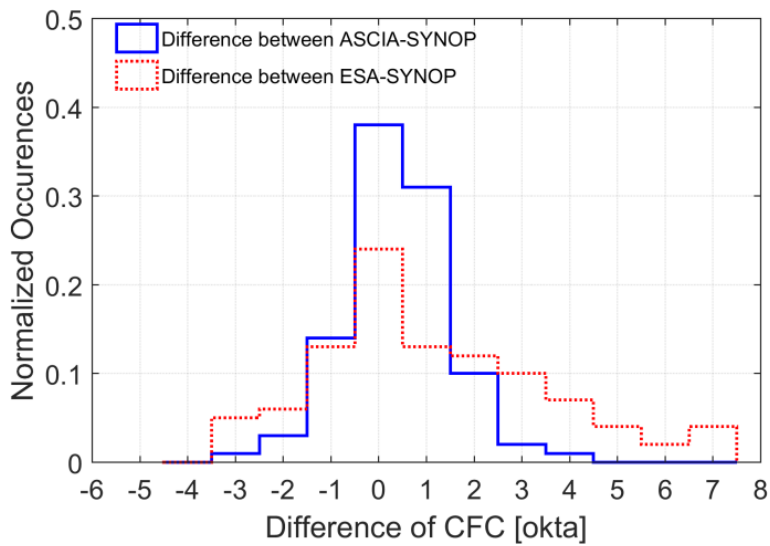

739

**Figure 15.** Histogram of CFC differences (blue: ASCIA minus SYNOP; red: ESA cloud product minus SYNOP).

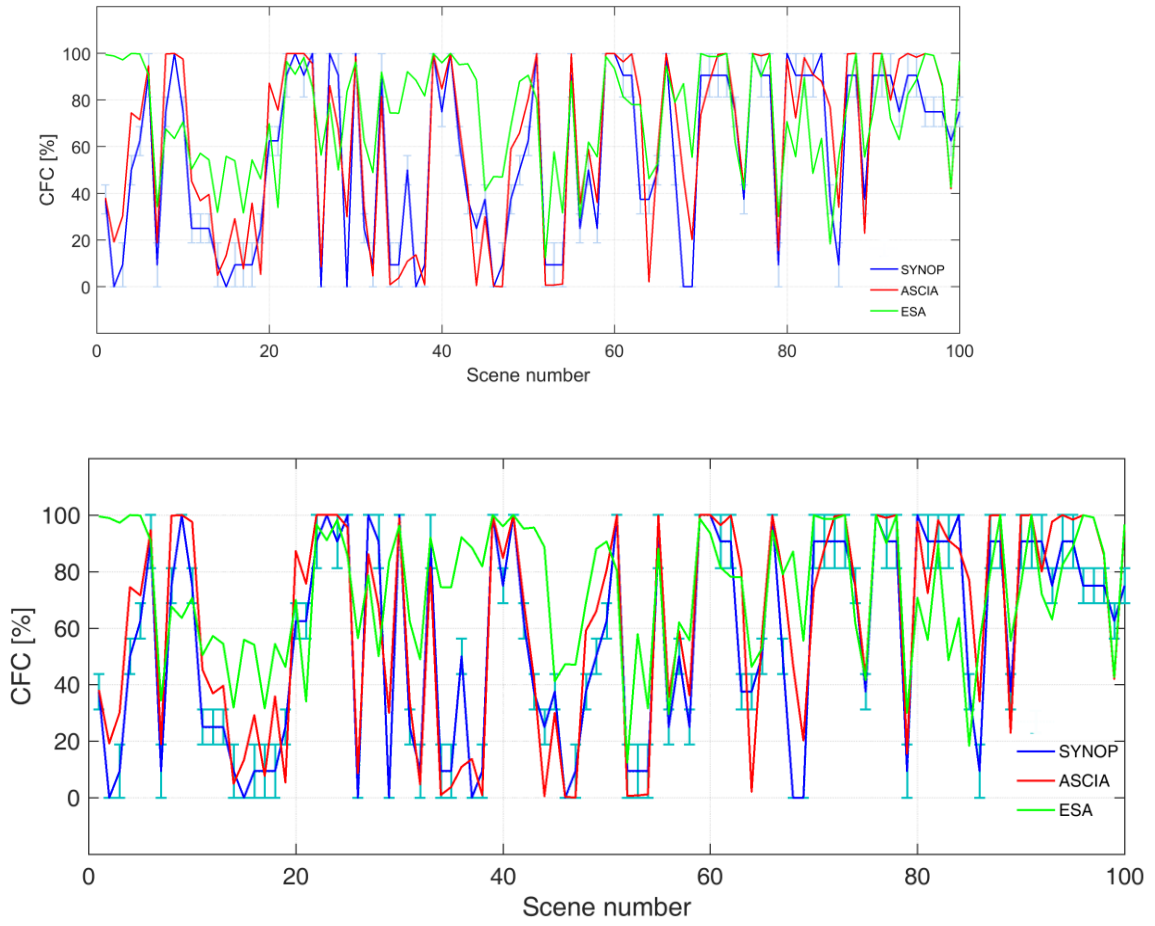

740 **Figure 16.** CFC in percent by ASCIA (red), SYNOP (blue) and ESA Cloud Product (green) for 100 scenarios of March, May and  
 741 July 2008 over Svalbard and Greenland. Light blue error bars show the range of percentage values for each okta from SYNOP  
 742 measurements.
